# Supplementary material for: Photogenerated chlorine radicals activate C(sp3)–H bonds of alkylbenzenes to access quinazolinones
Source: Royal Society of Chemistry journal article supplement (doi:10.1039/d4ob00129j), 2024-01-01

## Supporting Information

### Photogenerated chlorine radical activates C(sp<sup>3</sup>)-H bonds of alkylbenzenes to access quinazolinones

Xin-Yao Pan,<sup>‡</sup> Gui-Xia Sun,<sup>‡</sup> Fang-Ping Huang, Wen-Jian Qin, Qing-Hu Teng,\* Kai Wang\*

Guangxi Key Laboratory of Electrochemical and Magnetochemical Functional Materials, College of Chemistry and Bioengineering, Guilin University of Technology, E-mail: 2020130@glut.edu.cn; kaiwang@glut.edu.cn.

<sup>‡</sup> Xin-Yao Pan and Gui-Xia Sun contributed equally.

### Contents

|                                                                                        |     |
|----------------------------------------------------------------------------------------|-----|
| I. General information.....                                                            | S2  |
| II. Additional Optimization Experiments .....                                          | S3  |
| General Procedure for optimization of catalyst: .....                                  | S3  |
| General Procedure for optimization of additive: .....                                  | S4  |
| General Procedure for optimization of solvent:.....                                    | S4  |
| III. General Procedure for Oxidative Synthesis of Quinazolin-4(3 <i>H</i> )-ones ..... | S6  |
| General procedure for Oxidative Synthesis of Quinazolin-4(3 <i>H</i> )-ones .....      | S6  |
| IV. Controlled experiments.....                                                        | S6  |
| V. Characterizations of Products .....                                                 | S10 |
| VI. References.....                                                                    | S19 |
| VII. <sup>1</sup> H NMR and <sup>13</sup> C NMR Spectra .....                          | S20 |

## I. General information

NMR spectra were obtained on a BRUKER Ascend 500. Chemical shifts were recorded in parts per million (ppm,  $\delta$ ) relative to tetramethylsilane ( $\delta$  0.00).  $^1\text{H}$  NMR splitting patterns are designated as singlet (s), doublet (d), triplet (t), quartet (q), dd (doublet of doublets); m (multiplets), and etc. All first-order splitting patterns were assigned on the basis of the appearance of the multiplet. Splitting patterns that could not be easily interpreted are designated as multiplet (m) or broad (br). The  $^1\text{H}$  NMR (500 MHz) chemical shifts were measured relative to  $\text{CDCl}_3$  or  $\text{DMSO-d}_6$  as the internal reference ( $\text{CDCl}_3$ :  $\delta$  = 7.26 ppm;  $\text{DMSO-d}_6$ :  $\delta$  = 2.50 ppm). The  $^{13}\text{C}$  NMR (125 MHz) chemical shifts were given using  $\text{CDCl}_3$  or  $\text{DMSO-d}_6$  the internal standard ( $\text{CDCl}_3$ :  $\delta$  = 77.00 ppm;  $\text{DMSO-d}_6$ :  $\delta$  = 39.52 ppm). High-resolution mass spectra (HR-MS) were obtained with a BRUKER solanX 70 FT-MS (ESI<sup>+</sup>). Flash chromatography was performed using Qingdao Haiyang silica gel 300-400 with distilled solvents. Visualization was performed using a UV lamp. UV-vis absorption spectra were measured in the wavelength range of 250–800 nm using a Perkin-Elmer Lambda 750 UV/Visible Spectrometer.

Unless otherwise noted, all reagents were obtained from commercial suppliers and used without further purification.

### Photoreactor configuration:

The 25 W 450-460 nm LED lamps were purchased from FacaiLEDzhaoming (<https://shop358870690.taobao.com/index.htm?spm=2013.1.w5002-15754154505.2.1ef84d30UkiJ8U>). Reactions were irradiated by using a simple photoreactor consisting of two 25 W 450-460 nm LED lamps with a magnetic stirrer. The distance between blue lamp and the reaction tube was 8 cm.

Manufacturer: Xuzhou Aijia Electronic Technology Co., Ltd

Wavelength of peak intensity: 450-460 nm

Material of the irradiation vessel (15 mL Schlenk tubes): borosilicate glass.

Distance of the irradiation vessel from the light source: approximately 8 cm.

No use any filters.

### Reaction Setup:

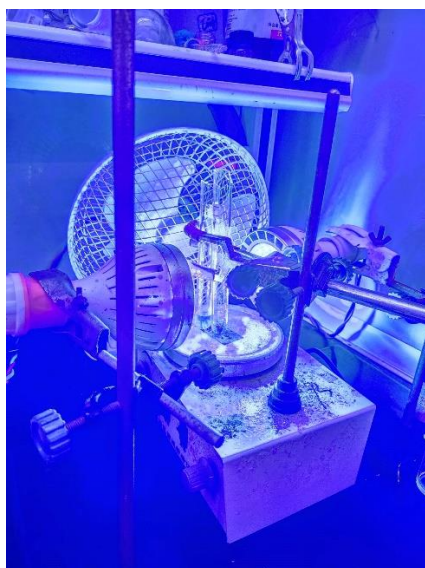

## II. Additional Optimization Experiments

### General Procedure for optimization of catalyst:

To a 15 mL silica tube containing a magnetic stir bar, was added 2-aminobenzamide **1a** (27.2 mg, 0.2 mmol), and catalyst (0.02 mmol, 10 mol%), then a mixture solvent of toluene (1 mL) and CH<sub>3</sub>CN (1 mL) was added under atmosphere of air. The mixture was stirred at 1400 RPM for 12 h under irradiation by blue LEDs at 65 °C. The reaction mixture was concentrated under reduced pressure and purified by column chromatography on silica gel (petroleum ether/ethyl acetate = 5:1) to afford quinazolin-4(3*H*)-one **3a**.

Table S1. Optimization of catalyst.

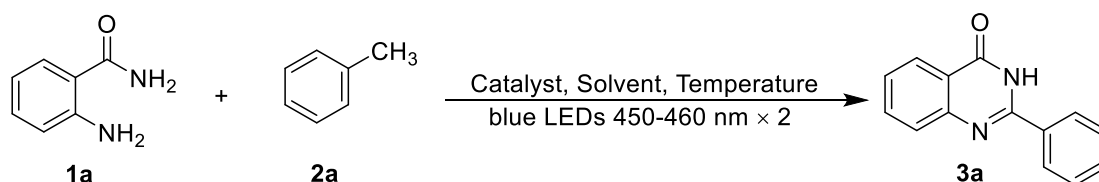

| Entry           | Catalyst                                             | Yield/% |
|-----------------|------------------------------------------------------|---------|
| 1               | Dy(NO <sub>3</sub> ) <sub>3</sub>                    | 30      |
| 2               | CuI                                                  | 0       |
| 3               | Sc(CF <sub>3</sub> SO <sub>3</sub> ) <sub>3</sub>    | 0       |
| 4               | CeCl <sub>3</sub> ·7H <sub>2</sub> O                 | 35      |
| 5               | Ce(NO <sub>3</sub> ) <sub>3</sub> ·6H <sub>2</sub> O | 30      |
| 6               | Ce(SO <sub>4</sub> ) <sub>2</sub> ·4H <sub>2</sub> O | 10      |
| 7               | Ce(OTf) <sub>3</sub>                                 | 50      |
| 8 <sup>c</sup>  | HCl                                                  | 45%     |
| 9 <sup>c</sup>  | CF <sub>3</sub> CH <sub>2</sub> OH                   | 5%      |
| 10 <sup>c</sup> | CF <sub>3</sub> SO <sub>3</sub> H                    | 26%     |

11<sup>d</sup>FeCl<sub>3</sub>·6H<sub>2</sub>O

83%

<sup>a</sup>Reactions conditions: **1a** (0.2 mmol), **2a** (1 mL), cat. (10 mol%), air atmosphere, in CH<sub>3</sub>CN (1 mL) at 65 °C under irradiation of 25 W blue LEDs × 2 for 12 h. <sup>b</sup>Isolated yield. <sup>c</sup>1 eq. Lewis acid was used. <sup>d</sup>Anhydrous toluene and ultra-dry acetonitrile are used for the reaction.

### General Procedure for optimization of additive:

To a 15 mL silica tube containing a magnetic stir bar, was added 2-aminobenzamide **1a** (27.2 mg, 0.2 mmol), additive (1 eq.) and FeCl<sub>3</sub> (0.02 mmol, 10 mol%), then a mixture solvent of toluene (1 mL) and CH<sub>3</sub>CN (1 mL) was added under atmosphere of air. The mixture was stirred at 1400 RPM for 12 h under irradiation by blue LEDs at 65 °C. The reaction mixture was concentrated under reduced pressure and purified by column chromatography on silica gel (petroleum ether/ethyl acetate = 5:1) to afford quinazolin-4(3*H*)-one **3a**.

Table S2. Optimization of additive.

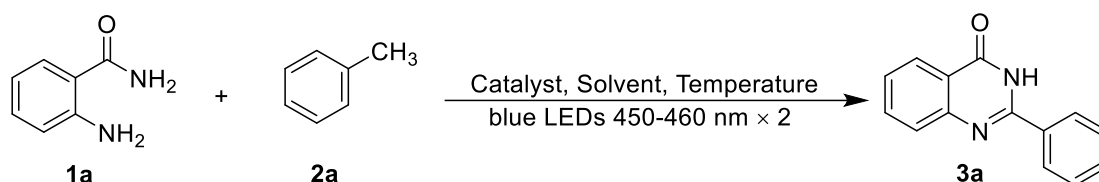

| Entry | Catalyst          | Solvent            | Additive                     | Yield/% |
|-------|-------------------|--------------------|------------------------------|---------|
| 1     | FeCl <sub>3</sub> | CH <sub>3</sub> CN | <i>n</i> Bu <sub>4</sub> NCl | 45      |
| 2     | FeCl <sub>3</sub> | CH <sub>3</sub> CN | NH <sub>4</sub> Cl           | 30      |
| 3     | FeCl <sub>3</sub> | CH <sub>3</sub> CN | NaCl                         | 10      |

<sup>a</sup>Reactions conditions: **1a** (0.2 mmol), **2a** (1 mL), FeCl<sub>3</sub> (10 mol%), additive (1 eq.) air atmosphere, in CH<sub>3</sub>CN (1 mL) at 65 °C under irradiation of 25 W blue LEDs × 2 for 12 h.

<sup>b</sup>Isolated yield.

### General Procedure for optimization of solvent:

To a 15 mL silica tube containing a magnetic stir bar, was added 2-aminobenzamide **1a** (27.2 mg, 0.2 mmol), **2a** (1 mL), and FeCl<sub>3</sub> (0.02 mmol, 10 mol%), then solvent was added under atmosphere of air. The mixture was stirred at 1400 RPM for 12 h under irradiation by blue LEDs at 65 °C. The reaction mixture was concentrated under reduced pressure and purified by column chromatography on silica gel (petroleum ether/ethyl acetate = 5:1) to afford quinazolin-4(3*H*)-one **3a**.

Table S3. Optimization of solvent.

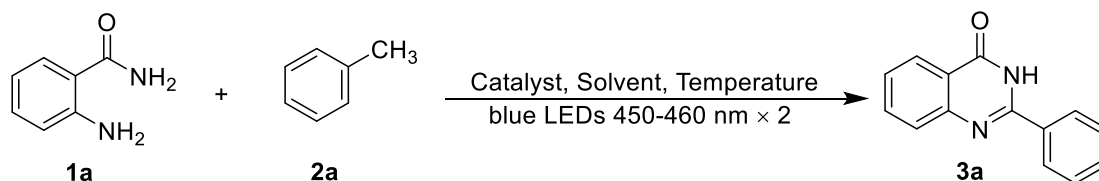

| Entry | Catalyst          | Solvent           | Yield/% |
|-------|-------------------|-------------------|---------|
| 1     | FeCl <sub>3</sub> | THF               | 5       |
| 2     | FeCl <sub>3</sub> | CHCl <sub>3</sub> | 30      |

|                 |                   |                    |    |
|-----------------|-------------------|--------------------|----|
| 3               | FeCl <sub>3</sub> | DCM                | 20 |
| 4               | FeCl <sub>3</sub> | DMSO               | 50 |
| 5               | FeCl <sub>3</sub> | CH <sub>3</sub> OH | 40 |
| 6               | FeCl <sub>3</sub> | 1,4-dioxane        | 5  |
| 7               | FeCl <sub>3</sub> | DMF                | 0  |
| 8               | FeCl <sub>3</sub> | H <sub>2</sub> O   | 30 |
| 9 <sup>c</sup>  | FeCl <sub>3</sub> | CH <sub>3</sub> CN | 20 |
| 10 <sup>d</sup> | FeCl <sub>3</sub> | CH <sub>3</sub> CN | 68 |
| 11 <sup>e</sup> | FeCl <sub>3</sub> | CH <sub>3</sub> CN | 69 |
| 12 <sup>f</sup> | FeCl <sub>3</sub> | CH <sub>3</sub> CN | 10 |

<sup>a</sup>Reactions conditions: **1a** (0.2 mmol), **2a** (1 mL), FeCl<sub>3</sub> (10 mol%), air atmosphere, in solvent (1 mL) at 65 °C under irradiation of 25 W blue LEDs × 2 for 12 h. <sup>b</sup>Isolated yield. <sup>c</sup>A mixture solvent of toluene (0.5 mL) and CH<sub>3</sub>CN (1 mL) was used. <sup>d</sup>A mixture solvent of toluene (1.5 mL) and CH<sub>3</sub>CN (1 mL) was used. <sup>e</sup>A mixture solvent of toluene (2 mL) and CH<sub>3</sub>CN (1 mL) was used. <sup>f</sup>A mixture solvent of toluene (10 eq., 0.21 mL) and CH<sub>3</sub>CN (1 mL) was used.

### III. General Procedure for Oxidative Synthesis of Quinazolin-4(3*H*)-ones

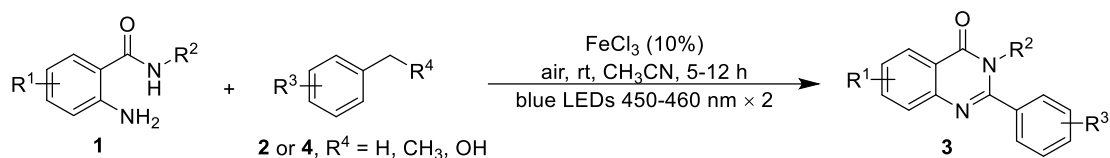

To a 15 mL silica tube containing a magnetic stir bar, was added 2-aminobenzamide **1** (27.2 mg, 0.2 mmol), **2** (1 mL) or **4** (1.2 eq.), and  $\text{FeCl}_3$  (0.02 mmol, 10 mol%), then  $\text{CH}_3\text{CN}$  (1 mL) was added under atmosphere of air. The mixture was stirred at 1400 RPM for 5-12 h under irradiation by blue LEDs at room temperature. The reaction mixture was concentrated under reduced pressure and purified by column chromatography on silica gel (petroleum ether/ethyl acetate = 5:1) to afford quinazolin-4(3*H*)-ones **3**.

**General procedure for Oxidative Synthesis of Quinazolin-4(3*H*)-ones in large-scale.**

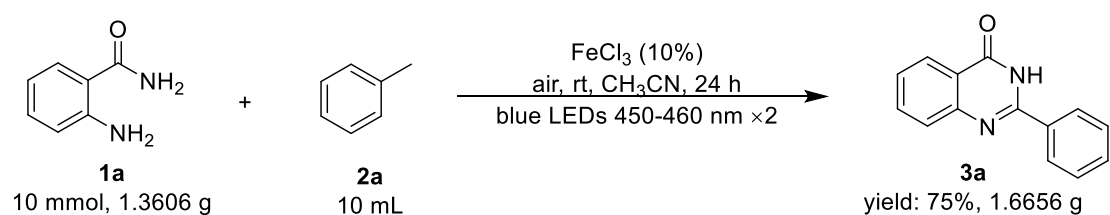

To a 15 mL silica tube containing a magnetic stir bar, was added 2-aminobenzamide **1a** (1.3606 g, 10 mmol), **2** (10 mL), and  $\text{FeCl}_3$  (1 mmol, 10 mol%), then  $\text{CH}_3\text{CN}$  (10 mL) was added under atmosphere of air. The mixture was stirred at 1400 RPM for 24 h under irradiation by blue LEDs at room temperature. The reaction mixture was concentrated under reduced pressure and purified by column chromatography on silica gel (petroleum ether/ethyl acetate = 5:1) to afford quinazolin-4(3*H*)-one **3a** in yield of 75%.

### IV. Controlled experiments

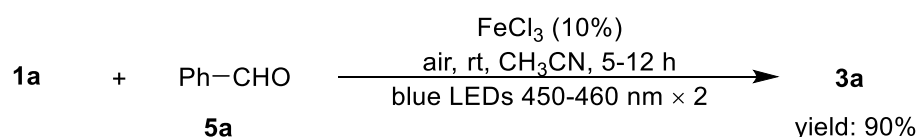

To a 15 mL silica tube containing a magnetic stir bar, was added 2-aminobenzamide **1a** (27.2 mg, 0.2 mmol), **5a** (1.2 eq.), and  $\text{FeCl}_3$  (0.02 mmol, 10 mol%), then  $\text{CH}_3\text{CN}$  (1 mL) was added under atmosphere of air. The mixture was stirred at 1400 RPM for 5-12 h under irradiation by blue LEDs at room temperature. The reaction mixture was concentrated under reduced pressure and purified by column chromatography on silica gel (petroleum ether/ethyl acetate = 5:1) to afford quinazolin-4(3*H*)-one **3a** in yield of 90%.

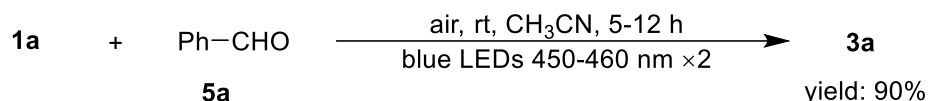

To a 15 mL silica tube containing a magnetic stir bar, was added 2-aminobenzamide **1a** (27.2 mg, 0.2 mmol), and **5a** (1.2 eq.), then CH<sub>3</sub>CN (1 mL) was added under atmosphere of air. The mixture was stirred at 1400 RPM for 5-12 h under irradiation by blue LEDs at room temperature. The reaction mixture was concentrated under reduced pressure and purified by column chromatography on silica gel (petroleum ether/ethyl acetate = 5:1) to afford quinazolin-4(3*H*)-one **3a** in yield of 90%.

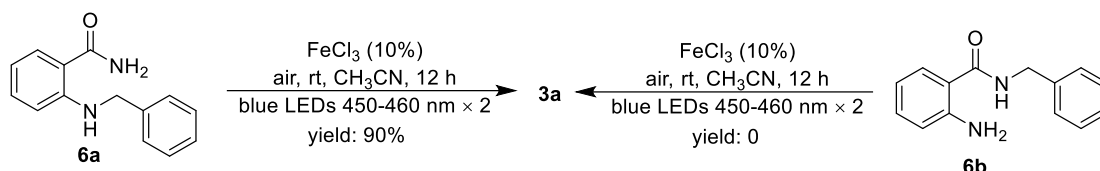

To a 15 mL silica tube containing a magnetic stir bar, was added 2-(benzylamino)benzamide **6a** (45.2 mg, 0.2 mmol), and FeCl<sub>3</sub> (0.02 mmol, 10 mol%), then CH<sub>3</sub>CN (1 mL) was added under atmosphere of air. The mixture was stirred at 1400 RPM for 12 h under irradiation by blue LEDs at room temperature. The reaction mixture was concentrated under reduced pressure and purified by column chromatography on silica gel (petroleum ether/ethyl acetate = 5:1) to afford quinazolin-4(3*H*)-one **3a** in yield of 90%.

To a 15 mL silica tube containing a magnetic stir bar, was added 2-amino-N-benzylbenzamide **6b** (45.2 mg, 0.2 mmol), and FeCl<sub>3</sub> (0.02 mmol, 10 mol%), then CH<sub>3</sub>CN (1 mL) was added under atmosphere of air. The mixture was stirred at 1400 RPM for 12 h under irradiation by blue LEDs at room temperature. The reaction mixture was concentrated under reduced pressure and purified by column chromatography on silica gel (petroleum ether/ethyl acetate = 5:1) to afford quinazolin-4(3*H*)-one **3a** in yield of 0%.

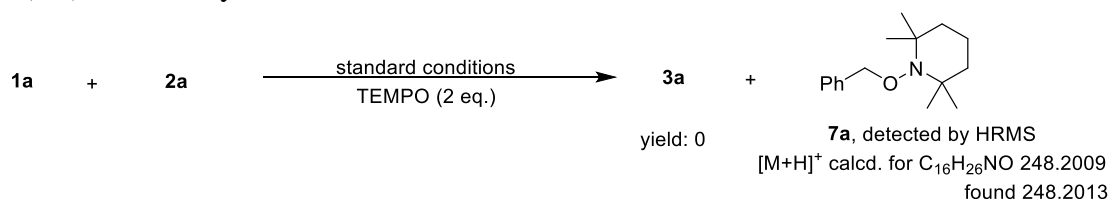

To a 15 mL silica tube containing a magnetic stir bar, was added 2-aminobenzamide **1a** (27.2 mg, 0.2 mmol), **2a** (1 mL), 2,2,6,6-tetramethyl-1-piperinedinyloxy (TEMPO) (0.4 mmol), and FeCl<sub>3</sub> (0.02 mmol, 10 mol%), then CH<sub>3</sub>CN (1 mL) was added under atmosphere of air. The mixture was stirred at 1400 RPM for 12 h under irradiation by blue LEDs at room temperature. The reaction mixture was concentrated under reduced pressure and purified by column chromatography on silica gel (petroleum ether/ethyl acetate = 5:1) to afford quinazolin-4(3*H*)-one **3a** in yield of 0%, and **7a** was detected by HRMS.

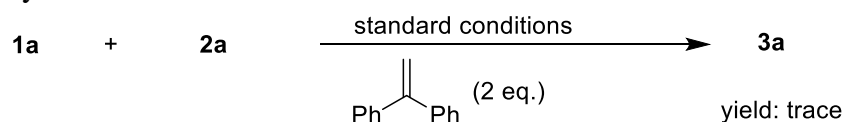

To a 15 mL silica tube containing a magnetic stir bar, was added 2-aminobenzamide **1a** (27.2 mg, 0.2 mmol), **2a** (1 mL), ethene-1,1-diyldibenzene (0.4 mmol), and FeCl<sub>3</sub> (0.02 mmol, 10 mol%), then CH<sub>3</sub>CN (1 mL) was added under atmosphere of air. The mixture was stirred at 1400 RPM for 12 h under irradiation by blue LEDs at room temperature. The reaction mixture was concentrated under reduced pressure and purified by column chromatography on silica gel (petroleum ether/ethyl acetate = 5:1) to afford quinazolin-4(3*H*)-one **3a** in trace yield.

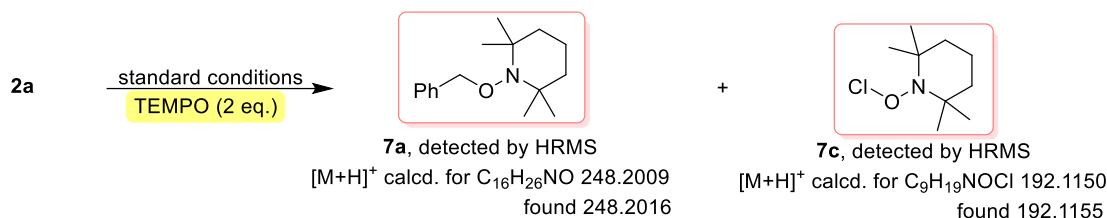

To a 15 mL silica tube containing a magnetic stir bar, was added **2a** (1 mL), 2,2,6,6-tetramethyl-1-piperinedinyloxy (TEMPO) (0.4 mmol), and FeCl<sub>3</sub> (0.02 mmol, 10 mol%), then CH<sub>3</sub>CN (1 mL) was added under atmosphere of air. The mixture was stirred at 1400 RPM for 12 h under irradiation by blue LEDs at room temperature. **7a** and **7c** were found in the reaction mixture by HRMS.

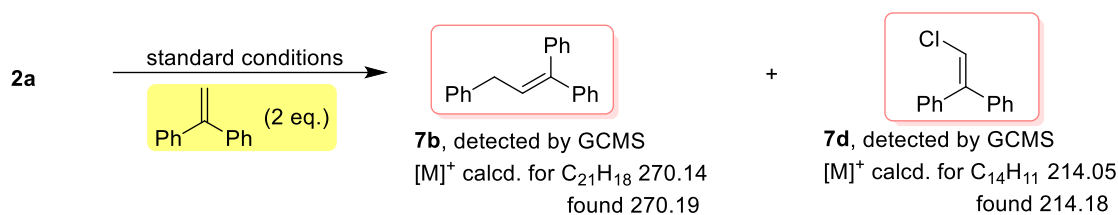

To a 15 mL silica tube containing a magnetic stir bar, was added **2a** (1 mL), ethene-1,1-diyldibenzene (0.4 mmol), and FeCl<sub>3</sub> (0.02 mmol, 10 mol%), then CH<sub>3</sub>CN (1 mL) was added under atmosphere of air. The mixture was stirred at 1400 RPM for 12 h under irradiation by blue LEDs at room temperature. **7b** and **7d** were found in the reaction mixture by GCMS.

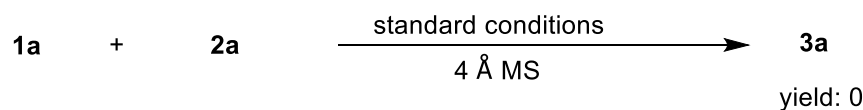

To a 15 mL silica tube containing a magnetic stir bar, was added 2-aminobenzamide **1a** (27.2 mg, 0.2 mmol), **2a** (1 mL), activated molecular sieves (powder, 4Å) (0.7 g), and FeCl<sub>3</sub> (0.02 mmol, 10 mol%), then CH<sub>3</sub>CN (1 mL) was added under atmosphere of air. The mixture was stirred at 1400 RPM for 12 h under irradiation by blue LEDs at room temperature. The reaction mixture was concentrated under reduced pressure and purified by column chromatography on silica gel (petroleum ether/ethyl acetate = 5:1) to afford quinazolin-4(3*H*)-one **3a** in yield of 0.

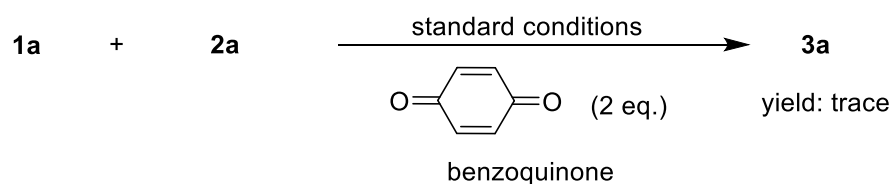



To a 15 mL silica tube containing a magnetic stir bar, was added 2-aminobenzamide **1a** (27.2 mg, 0.2 mmol), **2a** (1 mL), benzoquinone (43 mg, 0.4 mmol) and FeCl<sub>3</sub> (0.02 mmol, 10 mol%), then CH<sub>3</sub>CN (1 mL) was added under atmosphere of air. The mixture was stirred at 1400 RPM for 12 h under irradiation by blue LEDs at room temperature. The reaction mixture was concentrated under reduced pressure and purified by column chromatography on silica gel (petroleum ether/ethyl acetate = 5:1) to afford quinazolin-4(3*H*)-one **3a** in trace yield.

### UV-vis studies

Sample preparation

FeCl<sub>3</sub> (6.48 mg, 0.04 mmol) was dissolved in 2.0 mL of acetonitrile.

FeCl<sub>3</sub> (6.48 mg, 0.04 mmol) was dissolved in 1 mL of **2a** and 1.0 mL of acetonitrile.

**1a** (27.2 mg, 0.2 mmol) was dissolved in 2.0 mL of acetonitrile.

FeCl<sub>3</sub> (6.48 mg, 0.04 mmol) and **1a** (27.2 mg, 0.2 mmol) were dissolved in 2.0 mL of acetonitrile.

FeCl<sub>3</sub> (6.48 mg, 0.04 mmol) and **1a** (27.2 mg, 0.2 mmol) were dissolved in 1 mL of **2a** and 1.0 mL of acetonitrile.

**1a** (27.2 mg, 0.2 mmol) was dissolved in 1 mL of **2a** and 1.0 mL of acetonitrile.

The resultant solution was stirred for 15 minutes, and a 2.0 mL aliquot was drawn and added in a quartz cuvette.

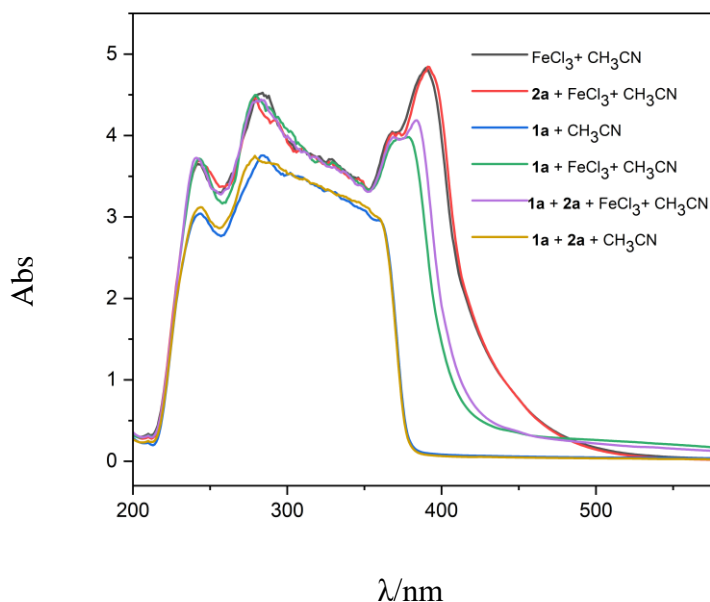

## V. Characterizations of Products

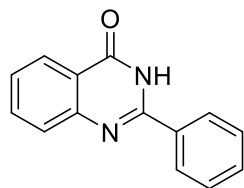

### 2-Phenylquinazolin-4(3H)-one (**3a**)<sup>[1]</sup>:

Following the general procedure, compound **3a** was obtained by column chromatography on silica gel (eluent: petroleum ether/EtOAc = 5:1, v/v), 35.5 mg, 80% yield, white solid.

<sup>1</sup>H NMR (500 MHz, DMSO-*d*<sub>6</sub>) δ 12.54 (s, 1H), 8.17 (dd, *J* = 12.8, 7.7 Hz, 3H), 7.83 (t, *J* = 7.7 Hz, 1H), 7.74 (d, *J* = 8.1 Hz, 1H), 7.55 (ddt, *J* = 21.6, 14.8, 7.2 Hz, 4H) ppm.

<sup>13</sup>C{<sup>1</sup>H} NMR (125 MHz, DMSO-*d*<sub>6</sub>) δ 162.7, 152.8, 149.3, 135.1, 133.2, 131.9, 129.1, 128.3, 128.0, 127.1, 126.3, 121.5 ppm. HRMS (ESI-TOF) [M+H]<sup>+</sup> calcd. for C<sub>14</sub>H<sub>11</sub>N<sub>2</sub>O 223.0866; found 223.0868.

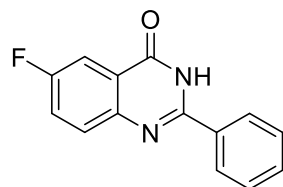

### 6-Fluoro-2-phenylquinazolin-4(3H)-one (**3b**)<sup>[2]</sup>:

Following the general procedure, compound **3b** was obtained by column chromatography on silica gel (eluent: petroleum ether/EtOAc = 5:1, v/v), 42.3 mg, 88% yield, white solid.

<sup>1</sup>H NMR (500 MHz, DMSO-*d*<sub>6</sub>) δ 12.66 (s, 1H), 8.20 – 8.11 (m, 2H), 7.81 (dt, *J* = 8.2, 3.8 Hz, 2H), 7.71 (td, *J* = 8.8, 2.9 Hz, 1H), 7.56 (dt, *J* = 15.0, 7.2 Hz, 3H) ppm. <sup>13</sup>C{<sup>1</sup>H}

NMR (125 MHz, DMSO-*d*<sub>6</sub>) δ 162.2 (d, *J* = 3.5 Hz), 160.5 (d, *J* = 245.5 Hz), 152.4, 146.2, 133.1, 132.0, 130.9 (d, *J* = 8.6 Hz), 129.2, 128.3, 123.6 (d, *J* = 24.1 Hz), 122.7 (d, *J* = 8.7 Hz), 111.1 (d, *J* = 23.1 Hz) ppm. HRMS (ESI-TOF) [M+H]<sup>+</sup> calcd. for C<sub>14</sub>H<sub>9</sub>FN<sub>2</sub>O 241.0772; found 241.0775.

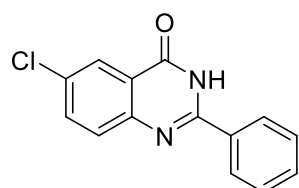

### 6-Chloro-2-phenylquinazolin-4(3H)-one (**3c**)<sup>[1]</sup>:

Following the general procedure, compound **3c** was obtained by column chromatography on silica gel (eluent: petroleum ether/EtOAc = 5:1, v/v), 44.0 mg, 86% yield, white solid.

<sup>1</sup>H NMR (500 MHz, DMSO-*d*<sub>6</sub>) δ 12.72 (s, 1H), 8.17 (d, *J* = 6.9 Hz, 2H), 8.09 (s, 1H), 7.87 (d, *J* = 8.7 Hz, 1H), 7.77 (d, *J* = 8.7 Hz, 1H), 7.57 (dt, *J* = 15.1, 7.3 Hz, 3H) ppm.

<sup>13</sup>C{<sup>1</sup>H} NMR (125 MHz, DMSO-*d*<sub>6</sub>) δ 161.9, 153.4, 148.0, 135.3, 133.0, 132.1, 131.3,

130.3, 129.2, 128.4, 125.4, 122.8 ppm. HRMS (ESI-TOF)  $[M+H]^+$  calcd. for  $C_{14}H_{10}ClN_2O$  257.0476; found 257.0475.

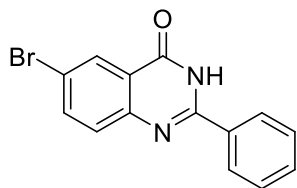

6-Bromo-2-phenylquinazolin-4(3H)-one (**3d**)<sup>[1]</sup>:

Following the general procedure, compound **3d** was obtained by column chromatography on silica gel (eluent: petroleum ether/EtOAc = 5:1, v/v), 53.4 mg, 89% yield, white solid.

$^1H$  NMR (500 MHz, DMSO- $d_6$ )  $\delta$  12.72 (s, 1H), 8.23 (s, 1H), 8.17 (d,  $J$  = 6.7 Hz, 2H), 7.98 (d,  $J$  = 11.1 Hz, 1H), 7.69 (d,  $J$  = 8.7 Hz, 1H), 7.57 (dt,  $J$  = 14.9, 7.2 Hz, 3H) ppm.

$^{13}C\{^1H\}$  NMR (125 MHz, DMSO- $d_6$ )  $\delta$  161.7, 153.5, 148.3, 138.0, 133.0, 132.2, 130.4, 129.2, 128.5, 128.4, 123.1, 119.5 ppm. HRMS (ESI-TOF)  $[M+H]^+$  calcd. for  $C_{14}H_{10}BrN_2O$  300.9971; found 300.9975.

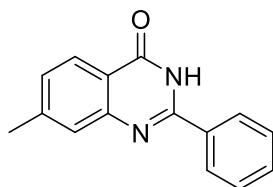

7-Methyl-2-phenylquinazolin-4(3H)-one (**3e**)<sup>[1]</sup>:

Following the general procedure, compound **3e** was obtained by column chromatography on silica gel (eluent: petroleum ether/EtOAc = 5:1, v/v), 38.2 mg, 81% yield, yellow solid.

$^1H$  NMR (500 MHz, DMSO- $d_6$ )  $\delta$  12.43 (s, 1H), 8.16 (d,  $J$  = 7.2 Hz, 2H), 8.03 (d,  $J$  = 8.0 Hz, 1H), 7.61 – 7.49 (m, 4H), 7.32 (d,  $J$  = 8.1 Hz, 1H), 2.45 (s, 3H) ppm.  $^{13}C\{^1H\}$  NMR (125 MHz, DMSO- $d_6$ )  $\delta$  162.6, 152.8, 149.3, 145.6, 133.2, 131.8, 129.1, 128.5, 128.2, 127.6, 126.2, 119.0, 21.8 ppm. HRMS (ESI-TOF)  $[M+H]^+$  calcd. for  $C_{15}H_{13}N_2O$  237.1022; found 237.1032.

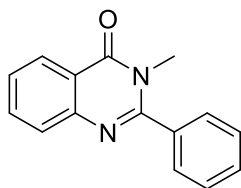

3-Methyl-2-phenylquinazolin-4(3H)-one (**3f**)<sup>[1]</sup>:

Following the general procedure, compound **3f** was obtained by column chromatography on silica gel (eluent: petroleum ether/EtOAc = 5:1, v/v), 41.6 mg, 88% yield, white solid.

$^1H$  NMR (500 MHz,  $CDCl_3$ )  $\delta$  8.33 (d,  $J$  = 8.1 Hz, 1H), 7.75 (d,  $J$  = 7.1 Hz, 2H), 7.61 – 7.44 (m, 6H), 3.49 (s, 3H) ppm.  $^{13}C\{^1H\}$  NMR (125 MHz,  $CDCl_3$ )  $\delta$  162.7, 156.1, 147.3, 135.4, 134.3, 130.1, 128.9, 128.0, 127.5, 127.0, 126.7, 120.5, 34.2 ppm. HRMS (ESI-TOF)  $[M+H]^+$  calcd. for  $C_{15}H_{13}N_2O$  237.1022; found 237.1031.

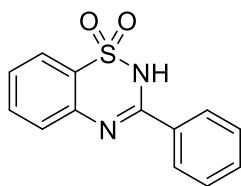

3-Phenyl-2*H*-benzo[*e*][1,2,4]thiadiazine 1,1-dioxide (**3g**)<sup>[3]</sup>:

Following the general procedure, compound **3g** was obtained by column chromatography on silica gel (eluent: petroleum ether/EtOAc = 5:1, v/v), 40.3 mg, 78% yield, white solid.

<sup>1</sup>H NMR (500 MHz, DMSO-*d*<sub>6</sub>) δ 12.21 (s, 1H), 8.04 (d, *J* = 7.6 Hz, 2H), 7.87 (d, *J* = 7.9 Hz, 1H), 7.72 (dt, *J* = 15.8, 7.6 Hz, 2H), 7.64 (d, *J* = 7.6 Hz, 3H), 7.51 (t, *J* = 7.6 Hz, 1H) ppm. <sup>13</sup>C{<sup>1</sup>H} NMR (125 MHz, DMSO-*d*<sub>6</sub>) δ 155.4, 136.0, 133.7, 133.4, 132.4, 129.4, 128.8, 127.3, 123.9, 122.0, 119.0 ppm. HRMS (ESI-TOF) [M+H]<sup>+</sup> calcd. for C<sub>13</sub>H<sub>11</sub>N<sub>2</sub>O<sub>2</sub>S 259.0536; found 259.0532.

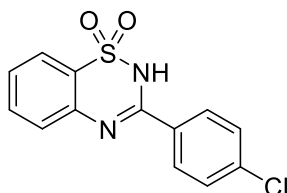

3-(4-Chlorophenyl)-2*H*-benzo[*e*][1,2,4]thiadiazine 1,1-dioxide (**3h**)<sup>[3]</sup>:

Following the general procedure, compound **3h** was obtained by column chromatography on silica gel (eluent: petroleum ether/EtOAc = 5:1, v/v), 23.3 mg, 40% yield, white solid.

<sup>1</sup>H NMR (500 MHz, DMSO-*d*<sub>6</sub>) δ 12.26 (s, 1H), 8.13 – 8.03 (m, 2H), 7.91 – 7.83 (m, 1H), 7.78 – 7.68 (m, 3H), 7.63 (d, *J* = 8.3 Hz, 1H), 7.52 (t, *J* = 7.7 Hz, 1H) ppm. <sup>13</sup>C{<sup>1</sup>H} NMR (125 MHz, DMSO-*d*<sub>6</sub>) δ 154.2, 138.3, 135.9, 133.7, 131.1, 130.7, 129.5, 127.4, 123.9, 122.0, 119.0 ppm. HRMS (ESI-TOF) [M+H]<sup>+</sup> calcd. for C<sub>13</sub>H<sub>10</sub>ClN<sub>2</sub>O<sub>2</sub>S 293.0146; found 293.0150.

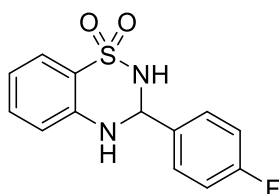

3-(4-Fluorophenyl)-3,4-dihydro-2*H*-benzo[*e*][1,2,4]thiadiazine 1,1-dioxide (**3i**)<sup>[4]</sup>:

Following the general procedure, compound **3i** was obtained by column chromatography on silica gel (eluent: petroleum ether/EtOAc = 5:1, v/v), 28.5 mg, 52.2% yield, white solid.

<sup>1</sup>H NMR (500 MHz, DMSO-*d*<sub>6</sub>) δ 7.92 (d, *J* = 11.7 Hz, 1H), 7.77 – 7.64 (m, 2H), 7.53 (d, *J* = 7.9 Hz, 1H), 7.40 (s, 1H), 7.30 (t, *J* = 8.8 Hz, 3H), 6.90 (d, *J* = 8.3 Hz, 1H), 6.77 (t, *J* = 7.5 Hz, 1H), 5.80 (d, *J* = 11.5 Hz, 1H) ppm. <sup>13</sup>C{<sup>1</sup>H} NMR (125 MHz, DMSO-*d*<sub>6</sub>) δ 162.87 (d, *J* = 245.2 Hz), 145.06, 134.14 (d, *J* = 3.0 Hz), 133.37, 130.32 (d, *J* = 8.4 Hz), 124.23, 122.74, 117.32, 116.84, 115.80 (d, *J* = 21.5 Hz), 67.50. HRMS (ESI-TOF) *m/z*: [M+H]<sup>+</sup> Calcd for C<sub>13</sub>H<sub>11</sub>FN<sub>2</sub>O<sub>2</sub>S 279.0582; Found 279.0598.

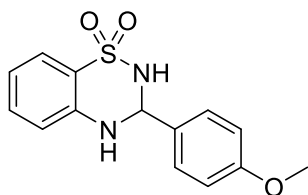

3-(4-Methoxyphenyl)-3,4-dihydro-2*H*-benzo[*e*][1,2,4]thiadiazine 1,1-dioxide (**3j**)<sup>[4]</sup>:

Following the general procedure, compound **3j** was obtained by column chromatography on silica gel (eluent: petroleum ether/EtOAc = 5:1, v/v), 24 mg, 41.4% yield, white solid.

<sup>1</sup>H NMR (500 MHz, DMSO-*d*<sub>6</sub>) δ 7.87 (d, *J* = 11.1 Hz, 1H), 7.52 (s, 1H), 7.37 (s, 2H), 7.29 (s, 2H), 7.21 (s, 1H), 6.99 (s, 1H), 6.90 (s, 1H), 6.76 (s, 1H), 5.74 (d, *J* = 10.5 Hz, 1H), 3.78 (s, 3H). <sup>13</sup>C{<sup>1</sup>H} NMR (125 MHz, DMSO-*d*<sub>6</sub>) δ 159.8, 144.3, 139.2, 130.1, 122.0, 120.3, 117.2, 116.8, 115.4, 113.3, 68.8, 55.7 ppm. HRMS (ESI-TOF) *m/z*: [M+H]<sup>+</sup> Calcd for C<sub>14</sub>H<sub>14</sub>N<sub>2</sub>O<sub>3</sub>S 291.0782; Found 291.0798.

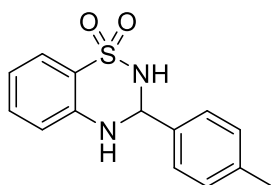

3-(*p*-Tolyl)-3,4-dihydro-2*H*-benzo[*e*][1,2,4]thiadiazine 1,1-dioxide (**3k**)<sup>[4]</sup>:

Following the general procedure, compound **3k** was obtained by column chromatography on silica gel (eluent: petroleum ether/EtOAc = 5:1, v/v), 27.4 mg, 50% yield, white solid.

<sup>1</sup>H NMR (500 MHz, DMSO-*d*<sub>6</sub>) δ 7.83 (d, *J* = 11.4 Hz, 1H), 7.60 – 7.44 (m, 3H), 7.38 – 7.18 (m, 4H), 6.89 (d, *J* = 7.9 Hz, 1H), 6.75 (t, *J* = 7.3 Hz, 1H), 5.72 (d, *J* = 12.1 Hz, 1H), 2.33 (s, 3H) ppm. <sup>13</sup>C{<sup>1</sup>H} NMR (125 MHz, DMSO-*d*<sub>6</sub>) δ 144.4, 138.1, 134.9, 133.3, 130.0, 127.9, 124.2, 122.3, 117.1, 116.8, 68.7, 21.3 ppm. HRMS (ESI-TOF) *m/z*: [M+H]<sup>+</sup> Calcd for C<sub>14</sub>H<sub>14</sub>N<sub>2</sub>O<sub>2</sub>S 275.0836; Found 275.0849.

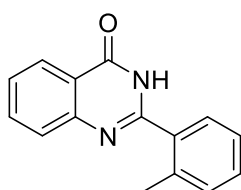

2-(*o*-Tolyl)quinazolin-4(3*H*)-one (**3l**)<sup>[1]</sup>:

Following the general procedure, compound **3l** was obtained by column chromatography on silica gel (eluent: petroleum ether/EtOAc = 5:1, v/v), 28.3 mg, 60% yield, white solid.

<sup>1</sup>H NMR (500 MHz, DMSO-*d*<sub>6</sub>) δ 12.44 (s, 1H), 8.17 (d, *J* = 8.0 Hz, 1H), 7.86 – 7.80 (m, 1H), 7.69 (d, *J* = 8.1 Hz, 1H), 7.57 – 7.48 (m, 2H), 7.43 (t, *J* = 7.6 Hz, 1H), 7.38 – 7.30 (m, 2H), 2.38 (s, 3H) ppm. <sup>13</sup>C{<sup>1</sup>H} NMR (125 MHz, DMSO-*d*<sub>6</sub>) δ 162.3, 154.9, 149.3, 136.6, 135.0, 134.6, 131.1, 130.4, 129.7, 127.9, 127.2, 126.31, 126.23, 121.5, 20.1 ppm. HRMS (ESI-TOF) [M+H]<sup>+</sup> calcd. for C<sub>15</sub>H<sub>13</sub>N<sub>2</sub>O 237.1022; found 237.1028.

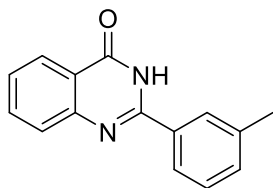

2-(*m*-Tolyl)quinazolin-4(3*H*)-one (**3m**)<sup>[5]</sup>:

Following the general procedure, compound **3m** was obtained by column chromatography on silica gel (eluent: petroleum ether/EtOAc = 5:1, v/v), 24.6 mg, 52% yield, white solid.

<sup>1</sup>H NMR (500 MHz, DMSO-*d*<sub>6</sub>) δ 12.47 (s, 1H), 8.15 (d, *J* = 8.5 Hz, 1H), 8.02 (s, 1H), 7.97 (d, *J* = 7.5 Hz, 1H), 7.83 (t, *J* = 7.7 Hz, 1H), 7.74 (d, *J* = 8.1 Hz, 1H), 7.51 (t, *J* = 7.5 Hz, 1H), 7.41 (dt, *J* = 13.5, 7.6 Hz, 2H), 2.40 (s, 3H) ppm. <sup>13</sup>C{<sup>1</sup>H} NMR (125 MHz, DMSO-*d*<sub>6</sub>) δ 162.7, 152.9, 149.3, 138.5, 135.1, 133.2, 132.5, 129.0, 128.8, 128.0, 127.1, 126.4, 125.4, 121.5, 21.5 ppm. HRMS (ESI-TOF) [M+H]<sup>+</sup> calcd. for C<sub>15</sub>H<sub>13</sub>N<sub>2</sub>O 237.1022; found 237.1029.

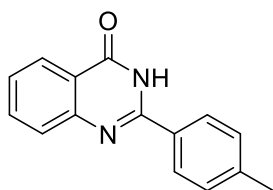

2-(*p*-Tolyl)quinazolin-4(3*H*)-one (**3n**)<sup>[11]</sup>:

Following the general procedure, compound **3n** was obtained by column chromatography on silica gel (eluent: petroleum ether/EtOAc = 5:1, v/v), 24.6 mg, 52% yield, white solid.

<sup>1</sup>H NMR (500 MHz, DMSO-*d*<sub>6</sub>) δ 12.48 (s, 1H), 8.14 (d, *J* = 6.3 Hz, 1H), 8.09 (d, *J* = 6.5 Hz, 2H), 7.87 – 7.79 (m, 1H), 7.72 (d, *J* = 8.1 Hz, 1H), 7.57 – 7.45 (m, 1H), 7.35 (d, *J* = 8.0 Hz, 2H), 2.39 (s, 3H) ppm. <sup>13</sup>C{<sup>1</sup>H} NMR (125 MHz, DMSO) δ 162.8, 152.8, 149.3, 142.0, 135.1, 130.4, 129.7, 128.2, 127.9, 126.9, 126.4, 121.4, 21.5 ppm. HRMS (ESI-TOF) [M+H]<sup>+</sup> calcd. for C<sub>15</sub>H<sub>13</sub>N<sub>2</sub>O 237.1022; found 237.1023.

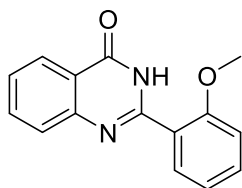

2-(2-Methoxyphenyl)quinazolin-4(3*H*)-one (**3o**)<sup>[6]</sup>:

Following the general procedure, compound **3o** was obtained by column chromatography on silica gel (eluent: petroleum ether/EtOAc = 5:1, v/v), 26.2 mg, 52% yield, white solid.

<sup>1</sup>H NMR (500 MHz, DMSO-*d*<sub>6</sub>) δ 12.12 (s, 1H), 8.15 (d, *J* = 8.0 Hz, 1H), 7.83 (t, *J* = 7.7 Hz, 1H), 7.70 (d, *J* = 7.7 Hz, 2H), 7.53 (s, 2H), 7.19 (d, *J* = 8.4 Hz, 1H), 7.08 (d, *J* = 7.6 Hz, 1H), 3.86 (s, 3H). <sup>13</sup>C{<sup>1</sup>H} NMR (125 MHz, DMSO-*d*<sub>6</sub>) δ 161.9, 157.7, 152.9, 149.6, 135.1, 132.8, 131.0, 128.0, 127.2, 126.4, 123.2, 121.6, 121.0, 112.5, 56.4 ppm. HRMS (ESI-TOF) [M+H]<sup>+</sup> calcd. for C<sub>15</sub>H<sub>13</sub>N<sub>2</sub>O<sub>2</sub> 253.0972; found 253.0975.

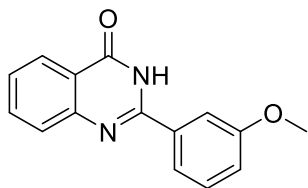

2-(3-Methoxyphenyl)quinazolin-4(3*H*)-one (**3p**)<sup>[2]</sup>:

Following the general procedure, compound **3p** was obtained by column chromatography on silica gel (eluent: petroleum ether/EtOAc = 5:1, v/v), 35.8 mg, 71% yield, white solid.

<sup>1</sup>H NMR (500 MHz, DMSO-*d*<sub>6</sub>) δ 12.55 (s, 1H), 8.15 (d, *J* = 8.0 Hz, 1H), 7.86 – 7.81 (m, 1H), 7.79 (d, *J* = 7.8 Hz, 1H), 7.75 (d, *J* = 8.4 Hz, 2H), 7.52 (t, *J* = 7.5 Hz, 1H), 7.49 – 7.43 (m, 1H), 7.14 (d, *J* = 8.4 Hz, 1H), 3.86 (s, 3H) ppm. <sup>13</sup>C{<sup>1</sup>H} NMR (125 MHz, DMSO-*d*<sub>6</sub>) δ 162.8, 159.9, 152.6, 149.2, 135.2, 134.5, 130.3, 128.1, 127.2, 126.4, 121.5, 120.7, 118.1, 113.0, 55.9, ppm. HRMS (ESI-TOF) [M+H]<sup>+</sup> calcd. for C<sub>15</sub>H<sub>13</sub>N<sub>2</sub>O<sub>2</sub> 253.0972; found 253.0974.

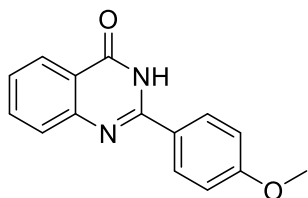

2-(4-Methoxyphenyl)quinazolin-4-(3*H*)-one (**3q**)<sup>[1]</sup>:

Following the general procedure, compound **3q** was obtained by column chromatography on silica gel (eluent: petroleum ether/EtOAc = 5:1, v/v), 34.8 mg, 69% yield, white solid.

<sup>1</sup>H NMR (500 MHz, DMSO-*d*<sub>6</sub>) δ 12.42 (s, 1H), 8.19 (d, *J* = 8.9 Hz, 2H), 8.13 (d, *J* = 7.9 Hz, 1H), 7.85 – 7.77 (m, 1H), 7.70 (d, *J* = 8.2 Hz, 1H), 7.48 (t, *J* = 7.5 Hz, 1H), 7.09 (d, *J* = 9.0 Hz, 2H), 3.85 (s, 3H) ppm. <sup>13</sup>C{<sup>1</sup>H} NMR (125 MHz, DMSO-*d*<sub>6</sub>) δ 162.9, 162.4, 152.4, 149.4, 135.1, 130.0, 127.8, 126.7, 126.4, 125.3, 121.2, 114.5, 56.0 ppm. HRMS (ESI-TOF) [M+H]<sup>+</sup> calcd. for C<sub>15</sub>H<sub>13</sub>N<sub>2</sub>O<sub>2</sub> 253.0972; found 253.0975.

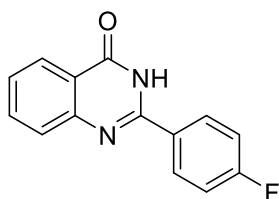

2-(4-Fluorophenyl)quinazolin-4(3*H*)-one (**3r**)<sup>[1]</sup>:

Following the general procedure, compound **3r** was obtained by column chromatography on silica gel (eluent: petroleum ether/EtOAc = 5:1, v/v), 32.2 mg, 67% yield, white solid.

<sup>1</sup>H NMR (500 MHz, DMSO-*d*<sub>6</sub>) δ 12.56 (s, 1H), 8.28 – 8.20 (m, 2H), 8.15 (d, *J* = 8.0 Hz, 1H), 7.83 (t, *J* = 8.4 Hz, 1H), 7.73 (d, *J* = 8.2 Hz, 1H), 7.55 – 7.49 (m, 1H), 7.39 (d, *J* = 8.6 Hz, 2H) ppm. <sup>13</sup>C{<sup>1</sup>H} NMR (125 MHz, DMSO) δ 164.6 (d, *J* = 249.8 Hz), 162.8, 151.9, 149.2, 135.2, 130.9 (d, *J* = 9.1 Hz), 129.8 (d, *J* = 3.0 Hz), 128.0, 127.2, 126.4, 121.4, 116.2 (d, *J* = 22.0 Hz) ppm. HRMS (ESI-TOF) [M+H]<sup>+</sup> calcd. for C<sub>14</sub>H<sub>10</sub>FN<sub>2</sub>O 241.0772; found 241.0780.

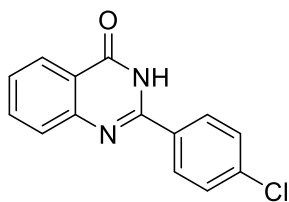

2-(4-Chlorophenyl)quinazolin-4(3*H*)-one (**3s**)<sup>[1]</sup>:

Following the general procedure, compound **3s** was obtained by column chromatography on silica gel (eluent: petroleum ether/EtOAc = 5:1, v/v), 35.8 mg, 70% yield, white solid.

<sup>1</sup>H NMR (500 MHz, DMSO-*d*<sub>6</sub>) δ 12.61 (s, 1H), 8.17 (dd, *J* = 23.3, 8.5 Hz, 3H), 7.84 (t, *J* = 7.9 Hz, 1H), 7.74 (d, *J* = 8.0 Hz, 1H), 7.62 (d, *J* = 8.4 Hz, 2H), 7.53 (t, *J* = 7.6 Hz, 1H) ppm. <sup>13</sup>C{<sup>1</sup>H} NMR (125 MHz, DMSO-*d*<sub>6</sub>) δ 163.8, 156.5, 151.9, 136.8, 135.2, 132.1, 130.1, 129.2, 128.0, 127.3, 126.4, 121.5 ppm. HRMS (ESI-TOF) [M+H]<sup>+</sup> calcd. for C<sub>14</sub>H<sub>9</sub>ClN<sub>2</sub>O 257.0476; found 257.0480.

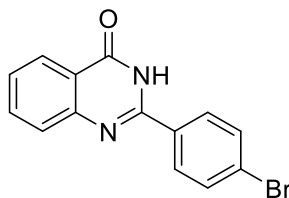

2-(4-Bromophenyl)quinazolin-4(3*H*)-one (**3t**)<sup>[1]</sup>:

Following the general procedure, compound **3t** was obtained by column chromatography on silica gel (eluent: petroleum ether/EtOAc = 5:1, v/v), 43.8 mg, 73% yield, white solid.

<sup>1</sup>H NMR (500 MHz, DMSO-*d*<sub>6</sub>) δ 12.62 (s, 1H), 8.17 – 8.08 (m, 3H), 7.84 (t, *J* = 7.7 Hz, 1H), 7.74 (t, *J* = 8.9 Hz, 3H), 7.53 (t, *J* = 7.6 Hz, 1H) ppm. <sup>13</sup>C NMR (125 MHz, DMSO-*d*<sub>6</sub>) δ 162.8, 152.1, 145.8, 135.2, 132.4, 132.1, 130.3, 128.0, 127.3, 126.4, 125.9, 121.8 ppm. HRMS (ESI-TOF) [M+H]<sup>+</sup> calcd. for C<sub>14</sub>H<sub>9</sub>BrN<sub>2</sub>O 300.9971; found 300.9975.

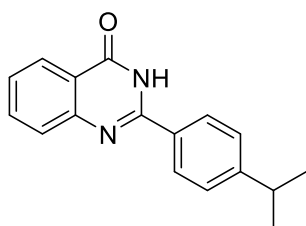

2-(4-Isopropylphenyl)quinazolin-4(3*H*)-one (**3u**)<sup>[7]</sup>:

Following the general procedure, compound **3u** was obtained by column chromatography on silica gel (eluent: petroleum ether/EtOAc = 5:1, v/v), 26.4 mg, 50% yield, white solid.

<sup>1</sup>H NMR (500 MHz, CDCl<sub>3</sub>) δ 11.84 (s, 1H), 8.34 (d, *J* = 8.4 Hz, 1H), 8.21 (d, *J* = 8.2 Hz, 2H), 7.81 (dd, *J* = 14.1, 8.5 Hz, 2H), 7.50 (t, *J* = 7.4 Hz, 1H), 7.43 (d, *J* = 8.3 Hz, 2H), 3.02 (p, *J* = 6.8 Hz, 1H), 1.32 (d, *J* = 7.0 Hz, 6H) ppm. <sup>13</sup>C{<sup>1</sup>H} NMR (125 MHz, CDCl<sub>3</sub>) δ 164.2, 152.9, 152.0, 149.6, 134.8, 130.2, 127.8, 127.6, 127.0, 126.5, 126.3, 120.7, 34.1, 23.7 ppm. HRMS (ESI-TOF) [M+H]<sup>+</sup> calcd. for C<sub>17</sub>H<sub>17</sub>N<sub>2</sub>O 265.1335; found 265.1340.



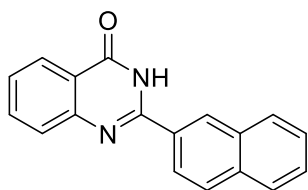

2-(Naphthalen-2-yl)quinazolin-4(3H)-one (**3v**)<sup>[1]</sup>:

Following the general procedure, compound **3v** was obtained by column chromatography on silica gel (eluent: petroleum ether/EtOAc = 5:1, v/v), 28.3 mg, 52% yield, white solid.

<sup>1</sup>H NMR (500 MHz, DMSO-*d*<sub>6</sub>) δ 12.67 (s, 1H), 8.81 (s, 1H), 8.30 (d, *J* = 8.6 Hz, 1H), 8.18 (d, *J* = 7.9 Hz, 1H), 8.06 (t, *J* = 7.4 Hz, 2H), 8.01 (d, *J* = 7.0 Hz, 1H), 7.90 – 7.82 (m, 1H), 7.80 (d, *J* = 8.1 Hz, 1H), 7.68 – 7.59 (m, 2H), 7.57 – 7.50 (m, 1H) ppm. <sup>13</sup>C{<sup>1</sup>H} NMR (125 MHz, DMSO-*d*<sub>6</sub>) δ 162.8, 152.8, 149.3, 135.2, 134.7, 132.8, 130.5, 129.5, 128.7, 128.6, 128.4, 128.2, 128.1, 127.4, 127.2, 126.4, 125.0, 121.6 ppm. HRMS (ESI-TOF) [M+H]<sup>+</sup> calcd. for C<sub>18</sub>H<sub>13</sub>N<sub>2</sub>O 273.1022; found 273.1025.

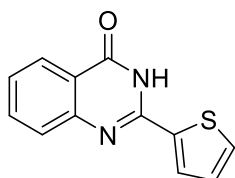

2-(Thiophen-2-yl)quinazolin-4(3H)-one (**3w**)<sup>[1]</sup>:

Following the general procedure, compound **3w** was obtained by column chromatography on silica gel (eluent: petroleum ether/EtOAc = 5:1, v/v), 19.6 mg, 43% yield, white solid.

<sup>1</sup>H NMR (500 MHz, DMSO-*d*<sub>6</sub>) δ 12.65 (s, 1H), 8.23 (d, *J* = 3.7 Hz, 1H), 8.12 (d, *J* = 7.8 Hz, 1H), 7.86 (d, *J* = 5.0 Hz, 1H), 7.82 – 7.76 (m, 1H), 7.65 (d, *J* = 8.1 Hz, 1H), 7.48 (t, *J* = 7.5 Hz, 1H), 7.23 (t, *J* = 4.4 Hz, 1H) ppm. <sup>13</sup>C{<sup>1</sup>H} NMR (125 MHz, DMSO-*d*<sub>6</sub>) δ 162.3, 149.2, 148.4, 137.9, 135.2, 132.7, 129.9, 129.1, 127.5, 126.9, 126.5, 121.4 ppm. HRMS (ESI-TOF) [M+H]<sup>+</sup> calcd. for C<sub>12</sub>H<sub>9</sub>N<sub>2</sub>OS 229.0430; found 229.0432.

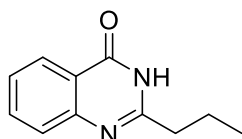

2-propylquinazolin-4(3H)-one (**3aa**)<sup>[9]</sup>:

Following the general procedure, compound **3aa** was obtained by column chromatography on silica gel (eluent: petroleum ether/EtOAc = 5:1, v/v), 24.2 mg, 64.3% yield, white solid.

<sup>1</sup>H NMR (500 MHz, DMSO-*d*<sub>6</sub>) δ 12.17 (s, 1H), 8.06 (d, *J* = 7.7 Hz, 1H), 7.75 (t, *J* = 7.2 Hz, 1H), 7.58 (d, *J* = 8.1 Hz, 1H), 7.44 (t, *J* = 7.5 Hz, 1H), 2.56 (t, *J* = 7.6 Hz, 2H), 1.72 (q, *J* = 7.4 Hz, 2H), 0.91 (t, *J* = 7.3 Hz, 3H). <sup>13</sup>C{<sup>1</sup>H} NMR (125 MHz, DMSO-*d*<sub>6</sub>) δ 162.3, 157.8, 149.4, 134.8, 127.3, 126.4, 126.1, 121.2, 36.8, 20.7, 14.0 ppm. HRMS (ESI-TOF) m/z: [M+H]<sup>+</sup> Calcd for C<sub>11</sub>H<sub>12</sub>N<sub>2</sub>O 189.1022; Found 189.1009.

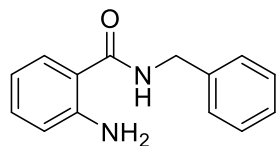

2-Amino-*N*-benzylbenzamide (**6b**)<sup>[8]</sup>:

Following the general procedure, compound **6b** was obtained by column chromatography on silica gel (eluent: petroleum ether/EtOAc = 5:1, v/v), 22.6 mg, 50% yield, white solid.

<sup>1</sup>H NMR (500 MHz, CDCl<sub>3</sub>) δ 7.41 – 7.27 (m, 6H), 7.23 – 7.17 (m, 1H), 6.68 (d, *J* = 8.2 Hz, 1H), 6.62 (t, *J* = 7.5 Hz, 1H), 6.41 (s, 1H), 5.55 (s, 2H), 4.59 (d, *J* = 5.7 Hz, 2H) ppm. <sup>13</sup>C{<sup>1</sup>H} NMR (125 MHz, CDCl<sub>3</sub>) δ 169.1, 148.8, 138.2, 132.3, 128.7, 127.7, 127.5, 127.1, 117.3, 116.5, 115.7, 43.6 ppm. HRMS (ESI-TOF) [M+H]<sup>+</sup> calcd. for C<sub>14</sub>H<sub>15</sub>N<sub>2</sub>O 227.1179; found 227.1180.

## VI. References

- [1] Q.-H. Teng, Y. Sun, Y. Yao, H.-T. Tang, J.-R. Li and Y.-M. Pan, *ChemElectroChem* **2019**, *6*, 3120–3124.
- [2] F.-C. Jia, Z.-W. Zhou, C. Xu, Y.-D. Wu. and A.-X. Wu, *Org. Lett.* **2016**, *18*, 2942–2945.
- [3] J. K. Laha, K. S. S. Tummalapalli, A. Nair and N. Patel, *J. Org. Chem.* **2015**, *80*, 11351–11359.
- [4] B.N. Patil, J. J. Lade, A. S. Karpe., B Pownthurai, K. S. Vadagaonkar, V. Mohanasrinivasan and A. C. Chaskar, *Tetrahedron Lett.* **2019**, *60*, 891-894.
- [5] Z. Xie, J. Lan, H. Zhu, G. Lei, G. Jiang, Z. Le, *Chin. Chem. Lett.* **2021**, *32*, 1427–1431.
- [6] Z. Zhang, M. Wang, C. Zhang, Z. Zhang, J. Lu and F. Wang, *Chem. Commun.* **2015**, *51*, 9205–9207.
- [7] K. Upadhyaya, R. K. Thakur, S. K. Shukla and R. P. Tripathi, *J. Org. Chem.* **2016**, *81*, 5046–5055.
- [8] Y. Jang, S. B. Lee, J. Hong, S. Chun, J. Lee and S. Hong, *Org. Biomol. Chem.* **2020**, *18*, 5435–5441.
- [9] X.-W. Liu, H. Fu, Y.-Y. Jiang and Y. -F. Zhao, *Angew.* **2009**, *121*, 354-351.

## VII. $^1\text{H}$ NMR and $^{13}\text{C}$ NMR Spectra

### $^1\text{H}$ NMR (DMSO- $d_6$ ) spectra of compound 3a

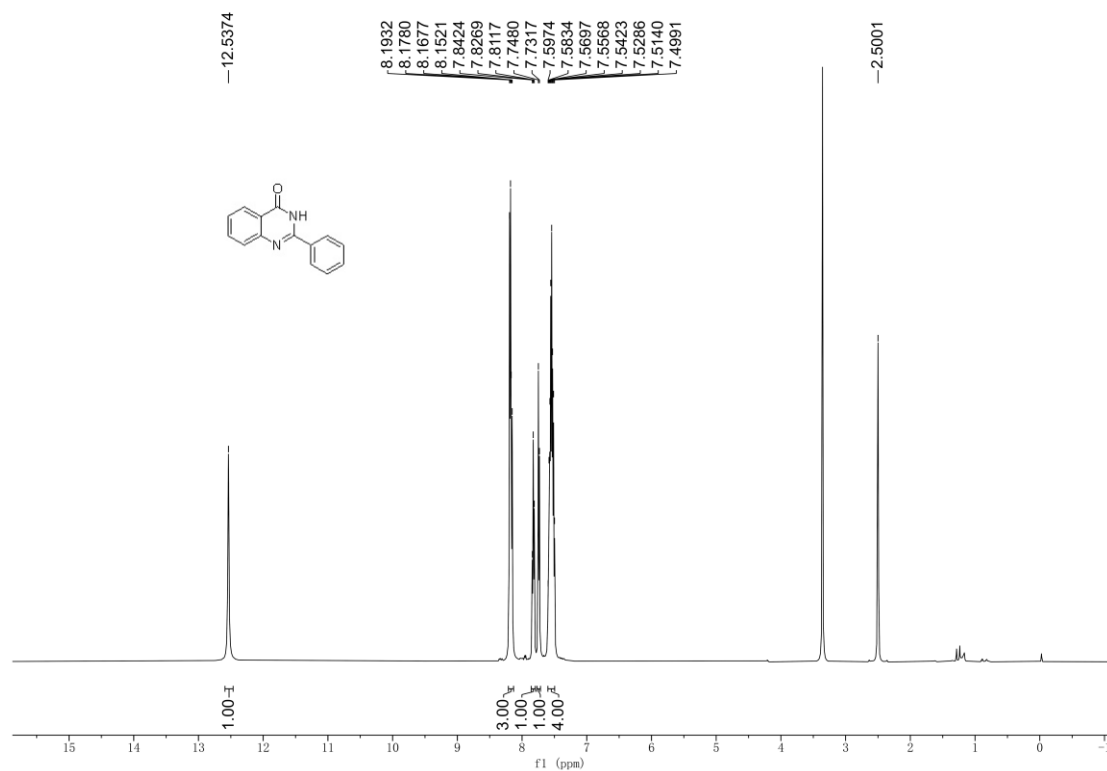

### $^{13}\text{C}$ NMR (DMSO- $d_6$ ) spectra of compound 3a

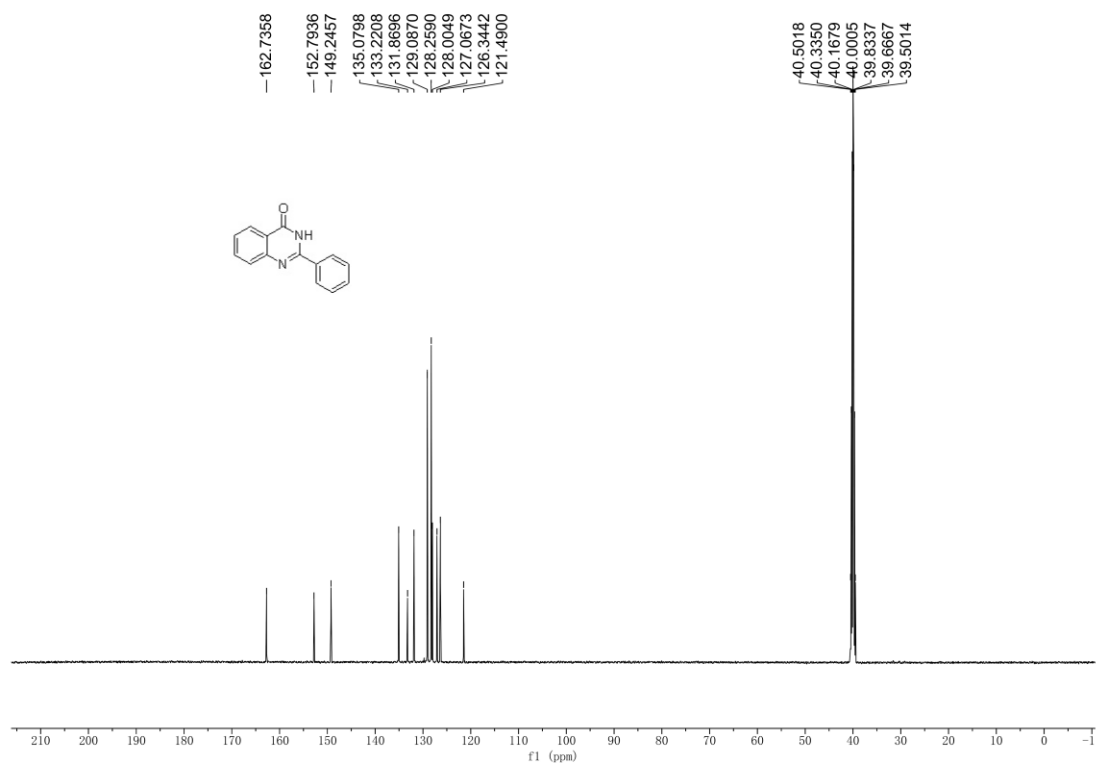

### <sup>1</sup>H NMR (DMSO-*d*<sub>6</sub>) spectra of compound 3b

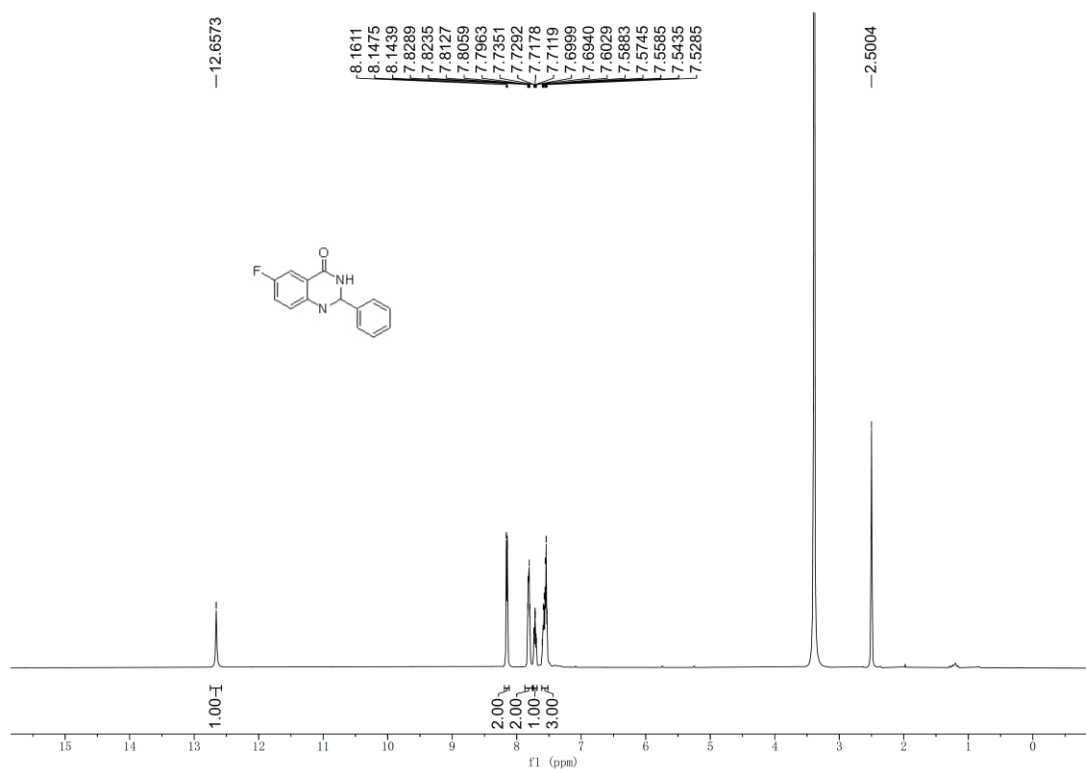

### <sup>13</sup>C NMR (DMSO-*d*<sub>6</sub>) spectra of compound 3b

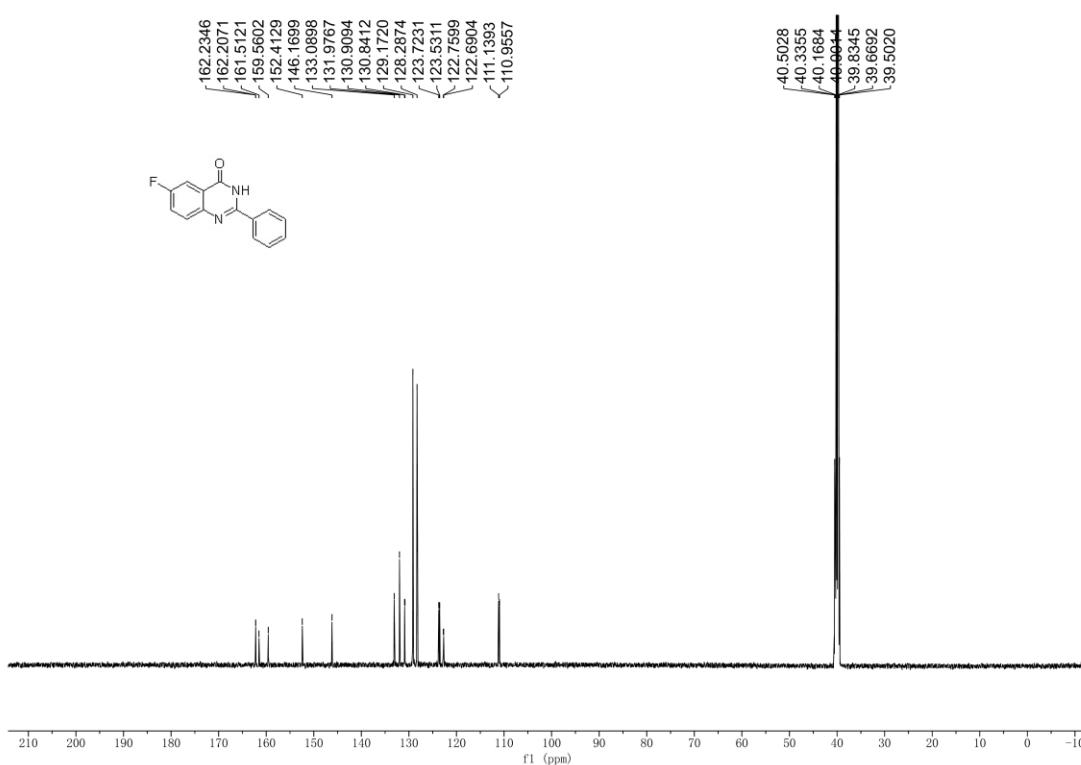

### <sup>1</sup>H NMR (DMSO-*d*<sub>6</sub>) spectra of compound 3c

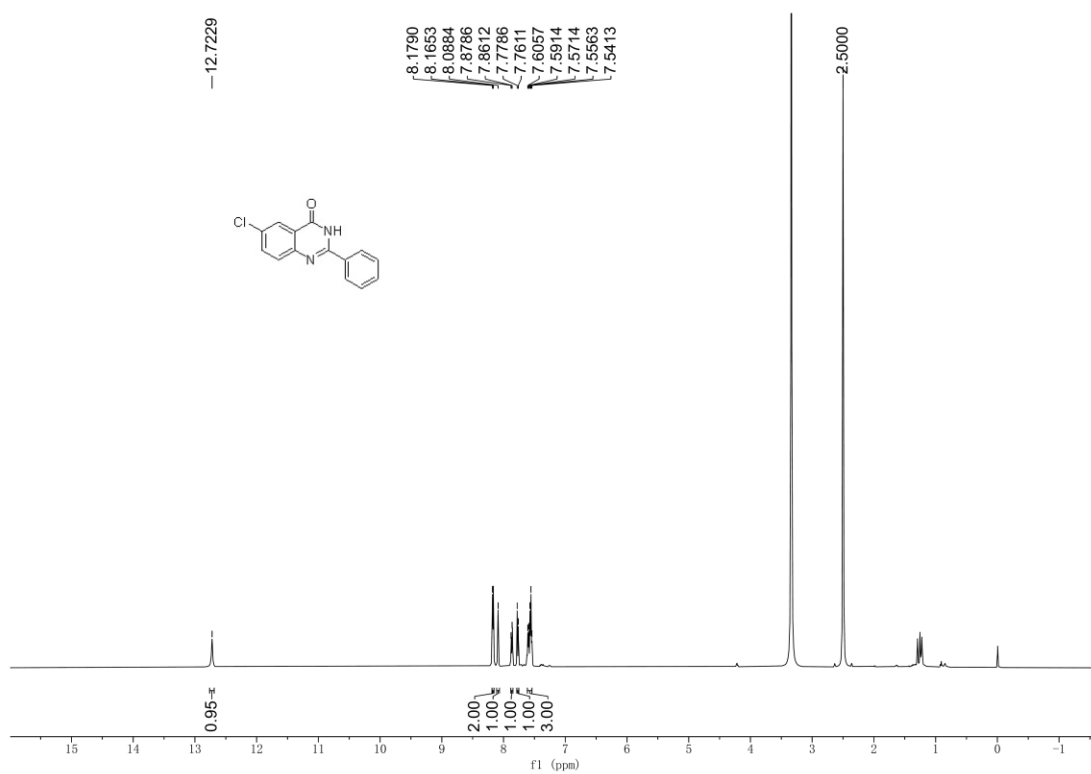

### <sup>13</sup>C NMR (DMSO-*d*<sub>6</sub>) spectra of compound 3c

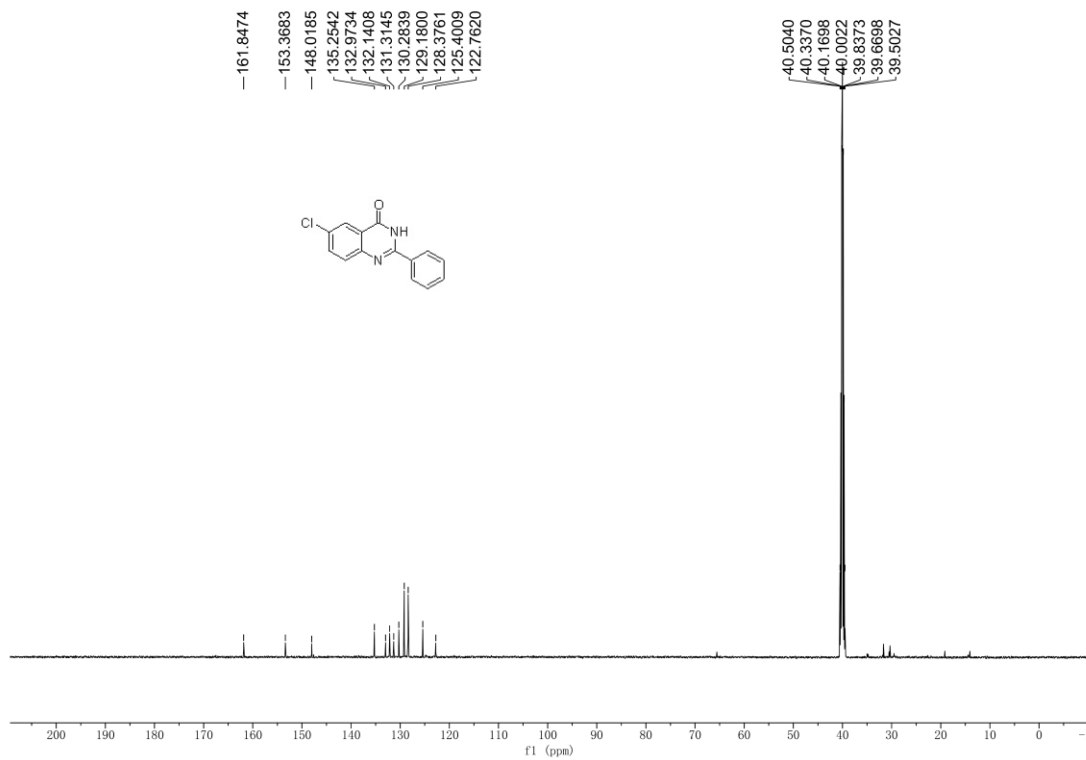

### <sup>1</sup>H NMR (DMSO-*d*<sub>6</sub>) spectra of compound 3d

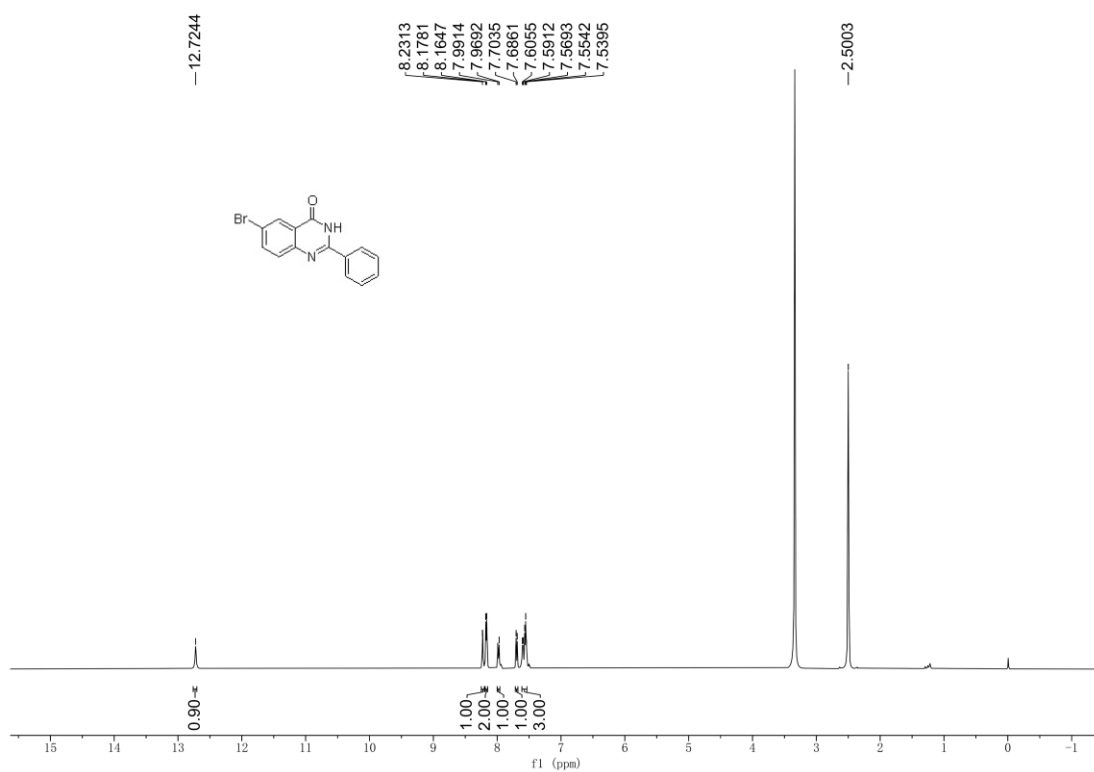

### <sup>13</sup>C NMR (DMSO-*d*<sub>6</sub>) spectra of compound 3d

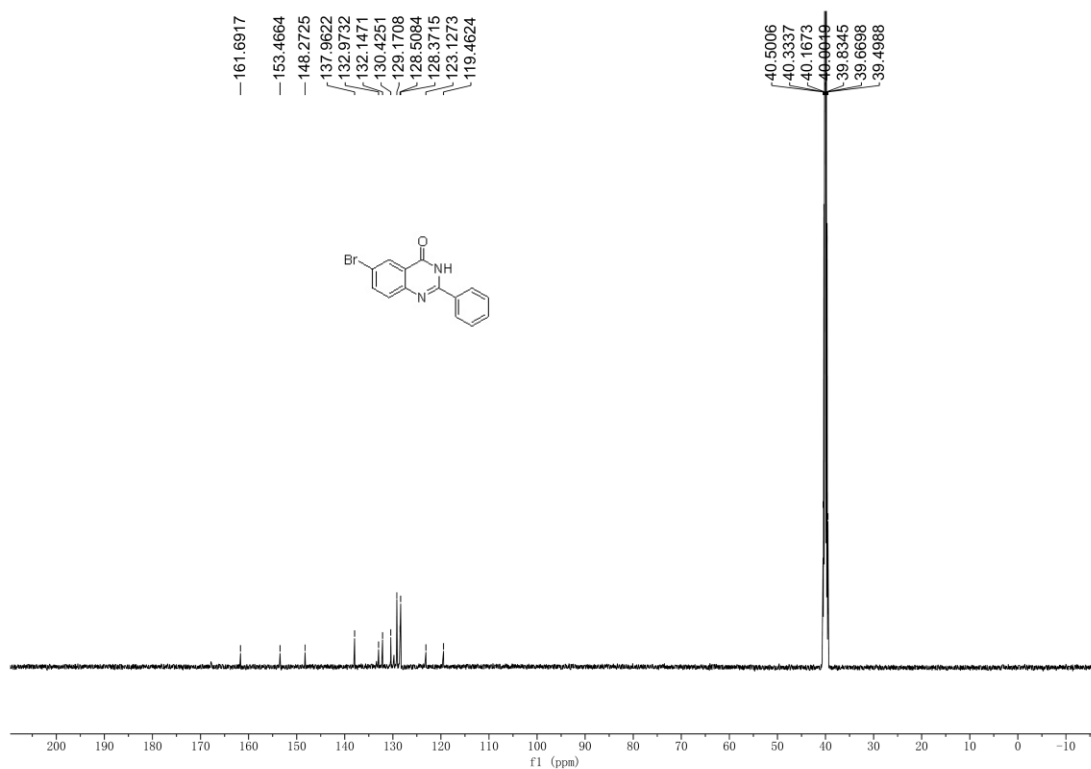

### <sup>1</sup>H NMR (DMSO-*d*<sub>6</sub>) spectra of compound 3e

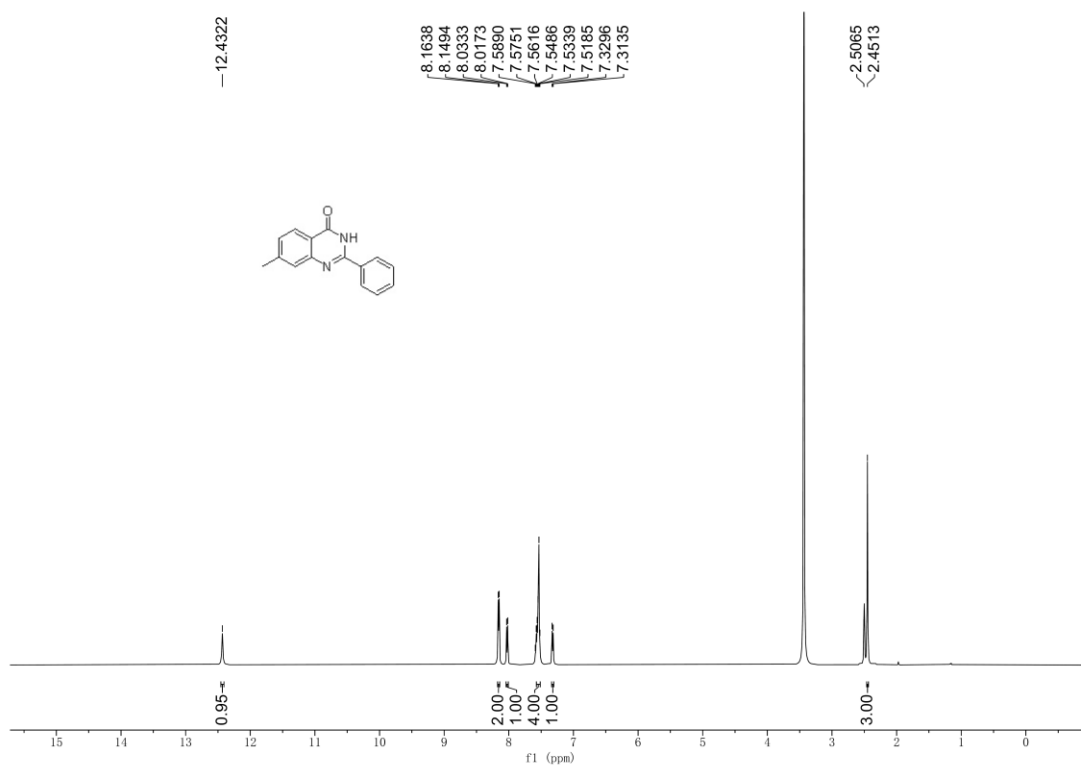

### <sup>13</sup>C NMR (DMSO-*d*<sub>6</sub>) spectra of compound 3e

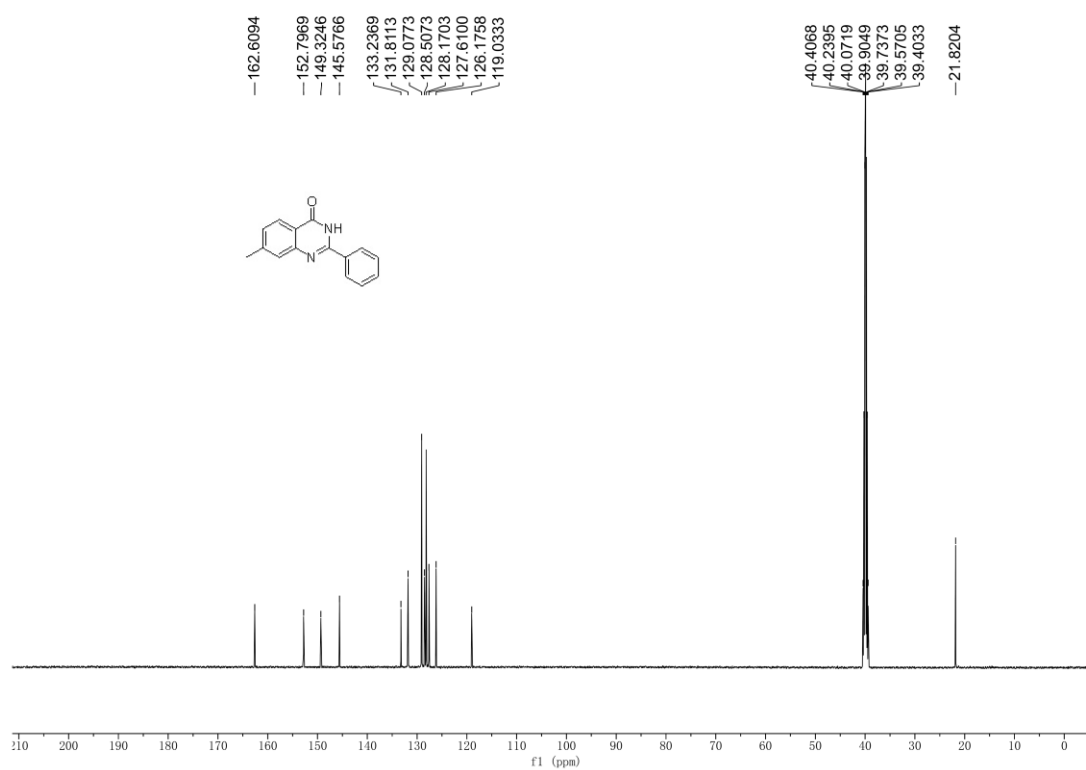



### <sup>1</sup>H NMR (CDCl<sub>3</sub>) spectra of compound 3f

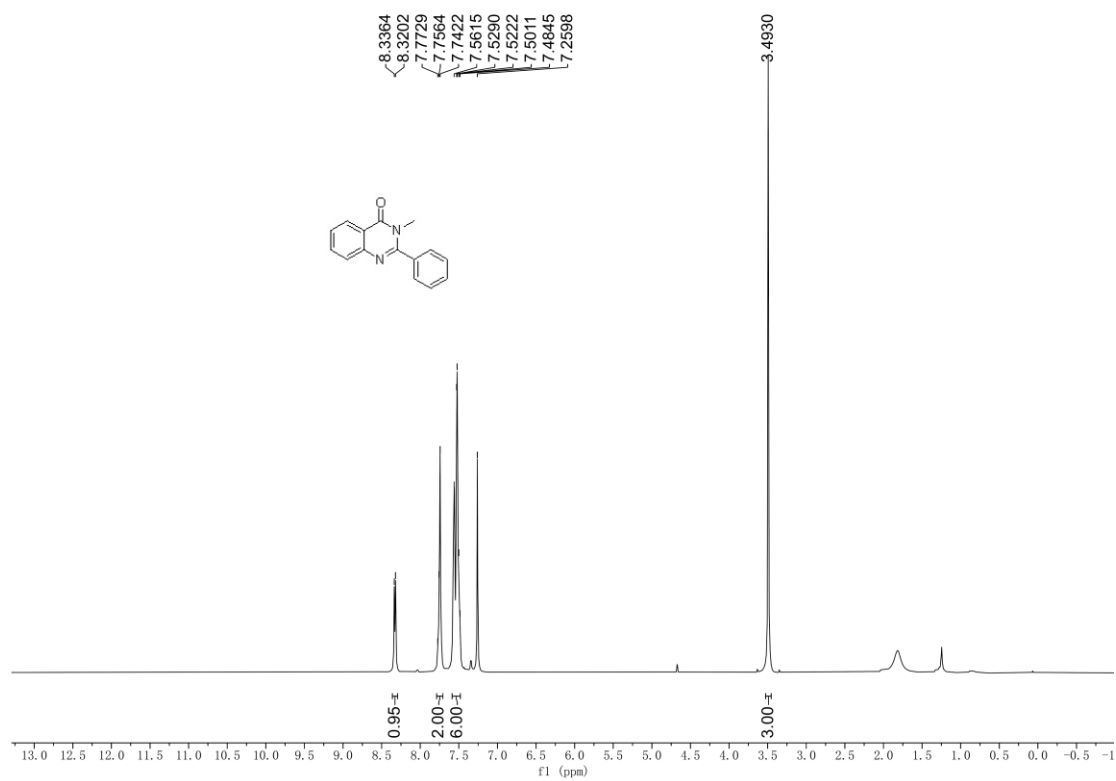

### <sup>13</sup>C NMR (CDCl<sub>3</sub>) spectra of compound 3f

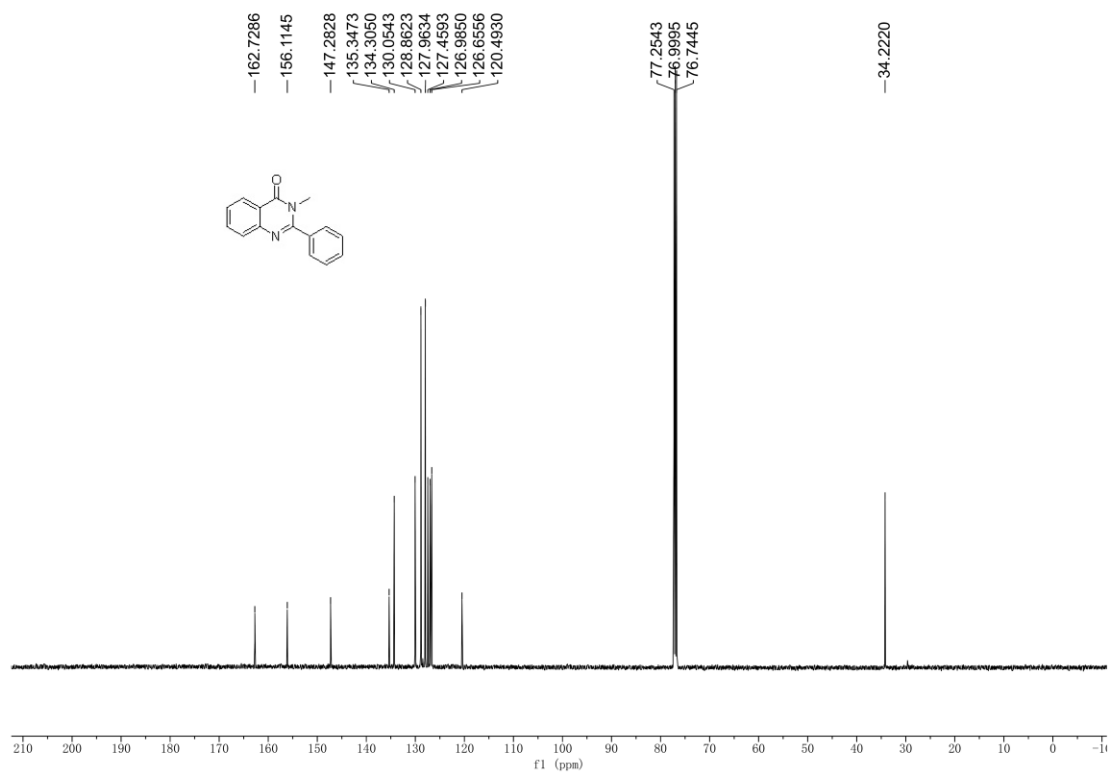

### <sup>1</sup>H NMR (DMSO-*d*<sub>6</sub>) spectra of compound 3g

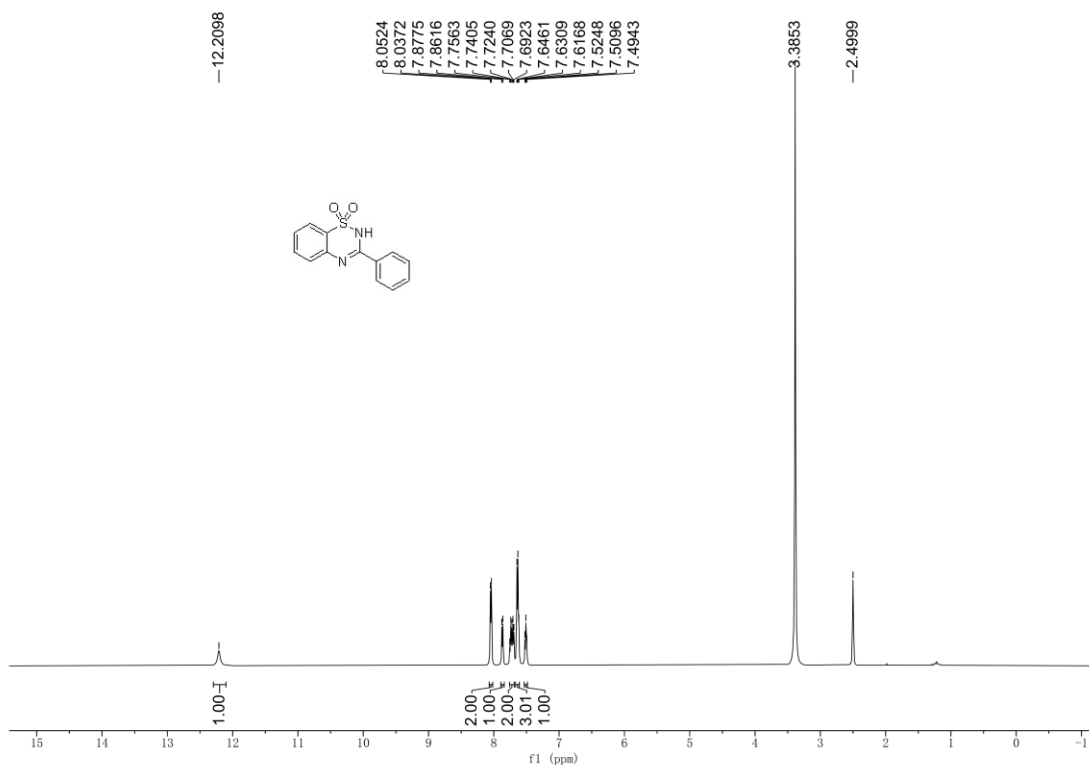

### <sup>13</sup>C NMR (DMSO-*d*<sub>6</sub>) spectra of compound 3g

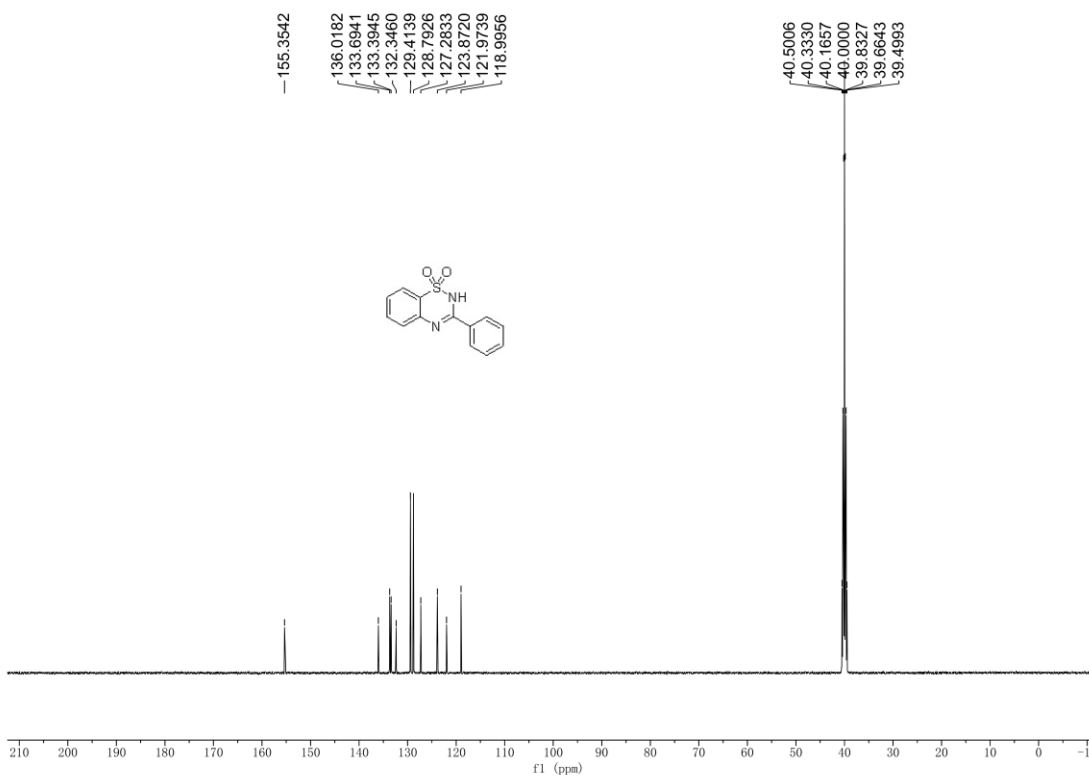

### <sup>1</sup>H NMR (DMSO-*d*<sub>6</sub>) spectra of compound 3h

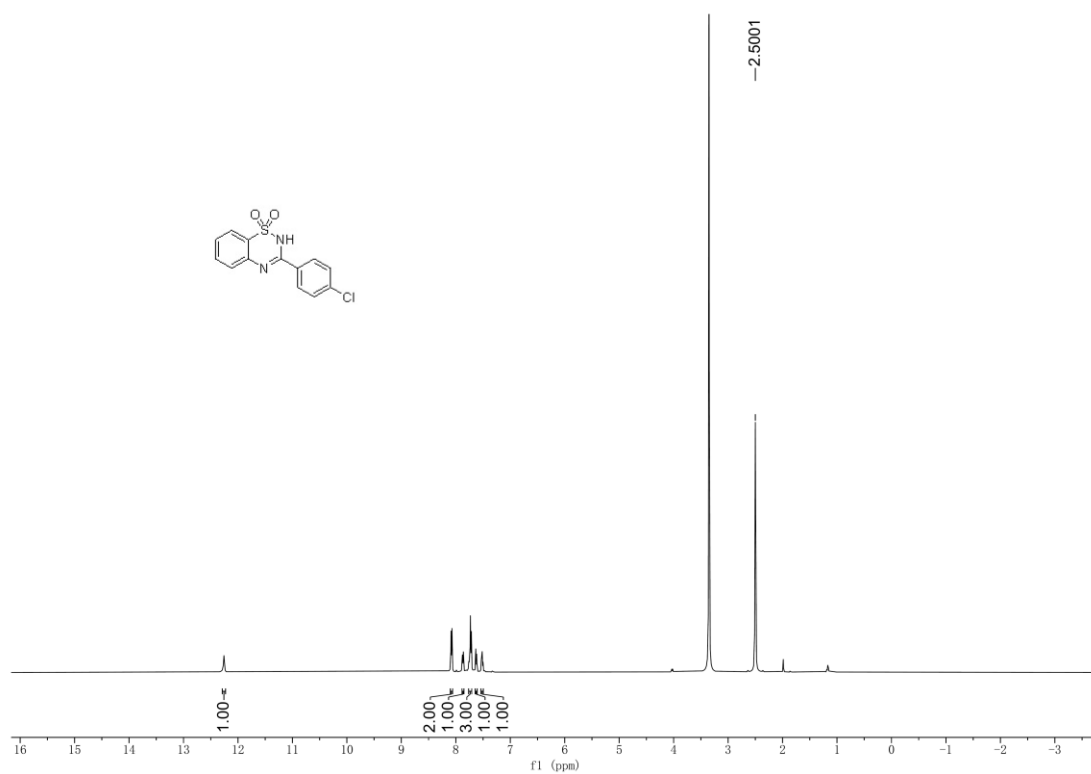

### <sup>13</sup>C NMR (DMSO-*d*<sub>6</sub>) spectra of compound 3h

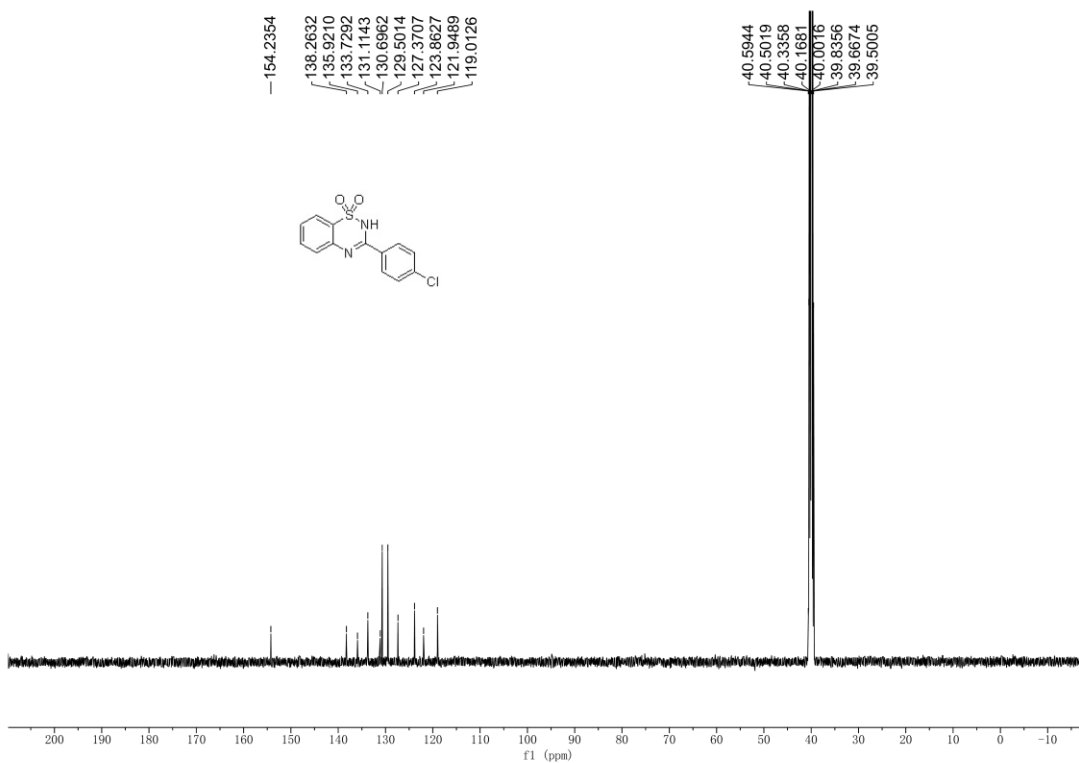

298.10.fid

### <sup>1</sup>H NMR (DMSO-d<sub>6</sub>) spectra of compound 3i

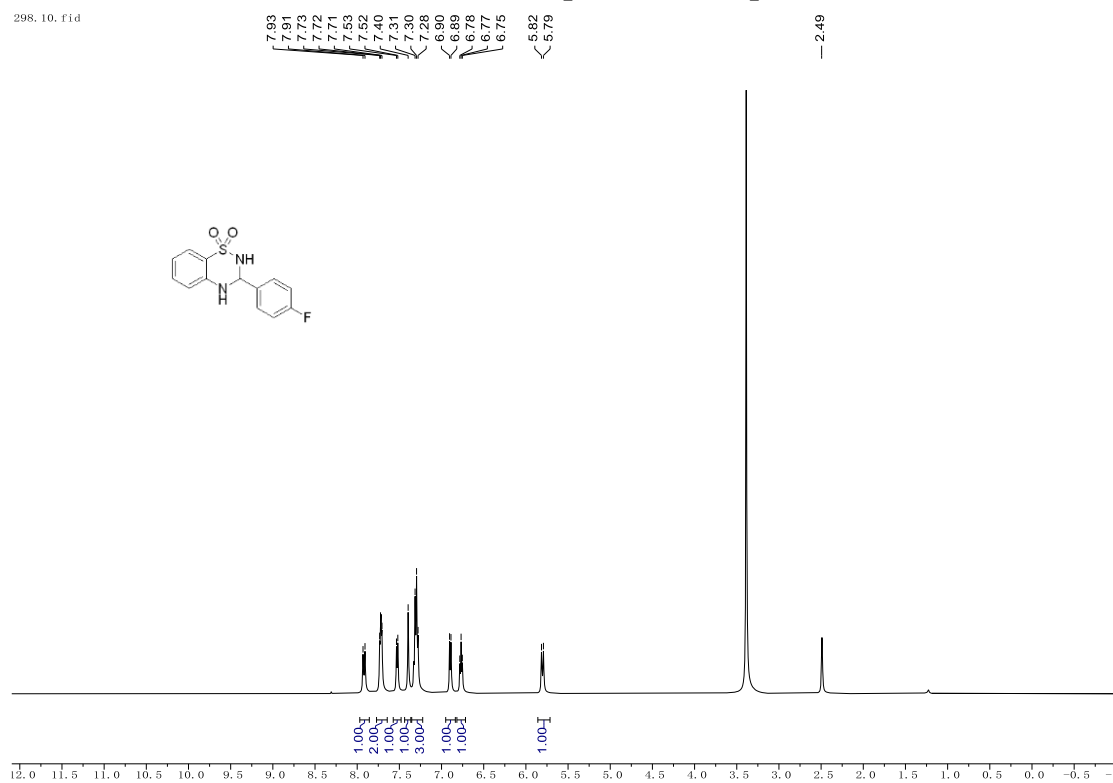

### <sup>13</sup>C NMR (DMSO-d<sub>6</sub>) spectra of compound 3i

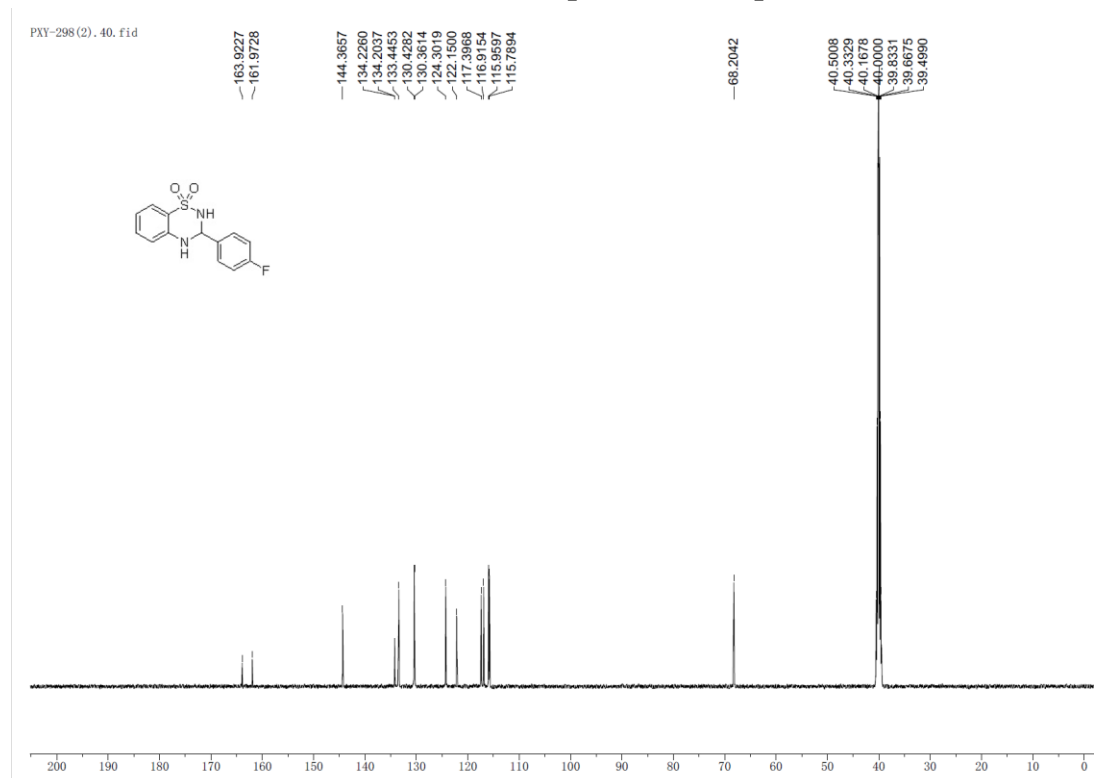

### <sup>1</sup>H NMR (DMSO-*d*<sub>6</sub>) spectra of compound 3j

300.10.fid

7.88  
7.86  
7.52  
7.37  
7.29  
7.21  
6.99  
6.90  
6.76

5.75  
5.73

3.78

2.49

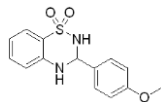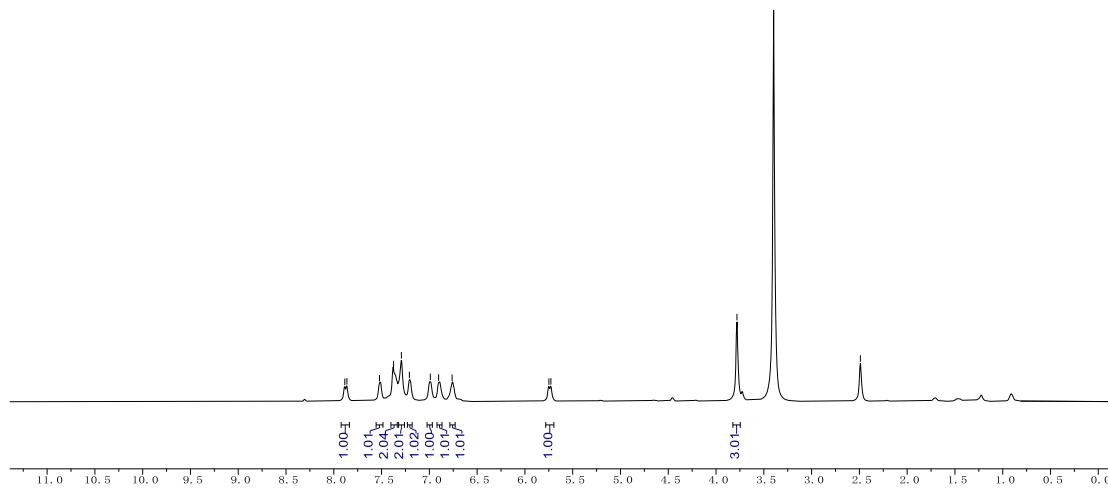

### <sup>13</sup>C NMR (DMSO-*d*<sub>6</sub>) spectra of compound 3j

PXY-300(1).20.fid

159.83

144.30

139.16

130.08

122.02

120.25

118.83

118.44

68.75

55.69

40.42 DMSO  
40.25 DMSO  
40.06 DMSO  
39.92 DMSO  
39.75 DMSO  
39.56 DMSO  
39.42 DMSO

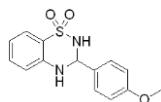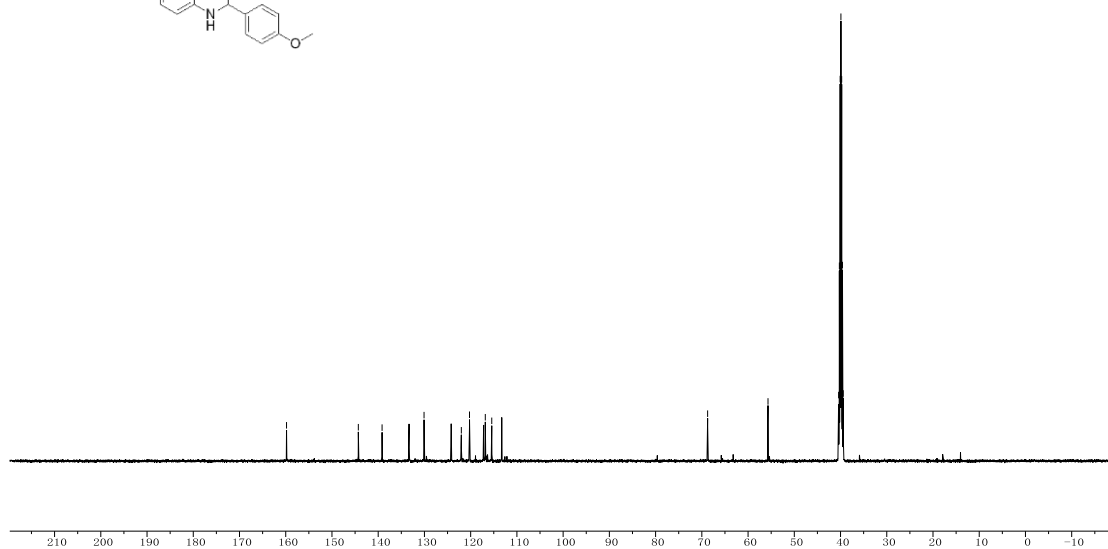

### <sup>1</sup>H NMR (DMSO-*d*<sub>6</sub>) spectra of compound 3k

PXY-297 (1). 20. fid

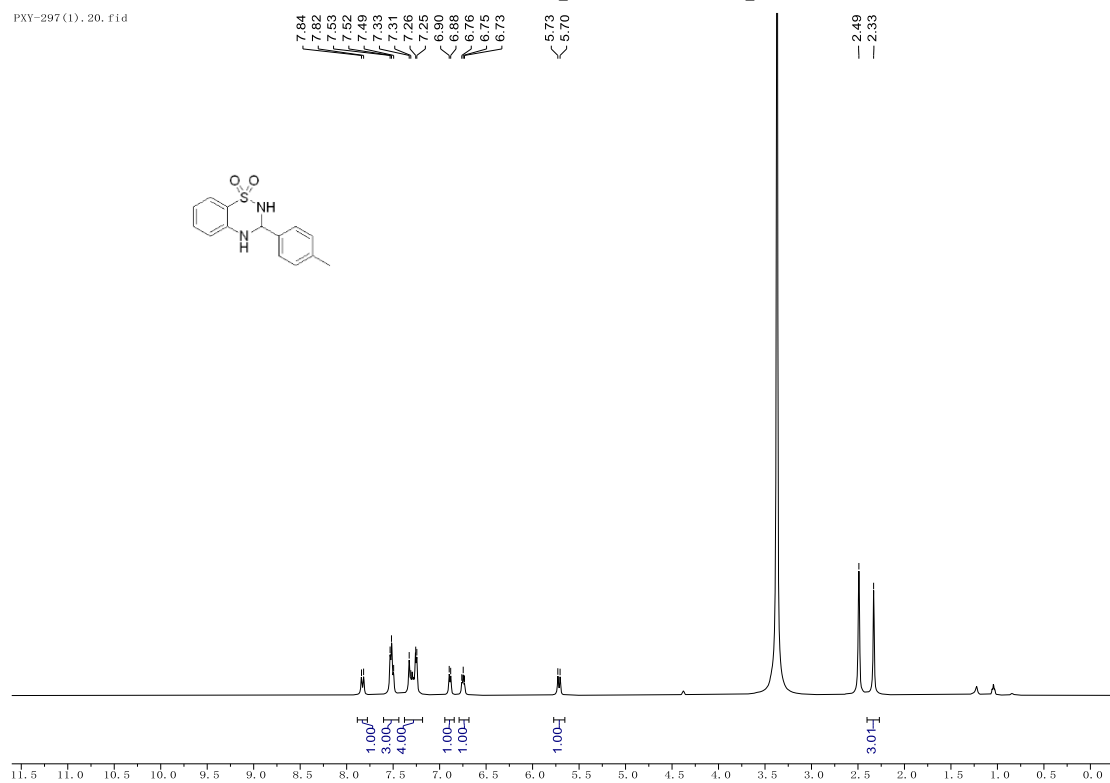

### <sup>13</sup>C NMR (DMSO-*d*<sub>6</sub>) spectra of compound 3k

PXY-297 (2). 30. fid

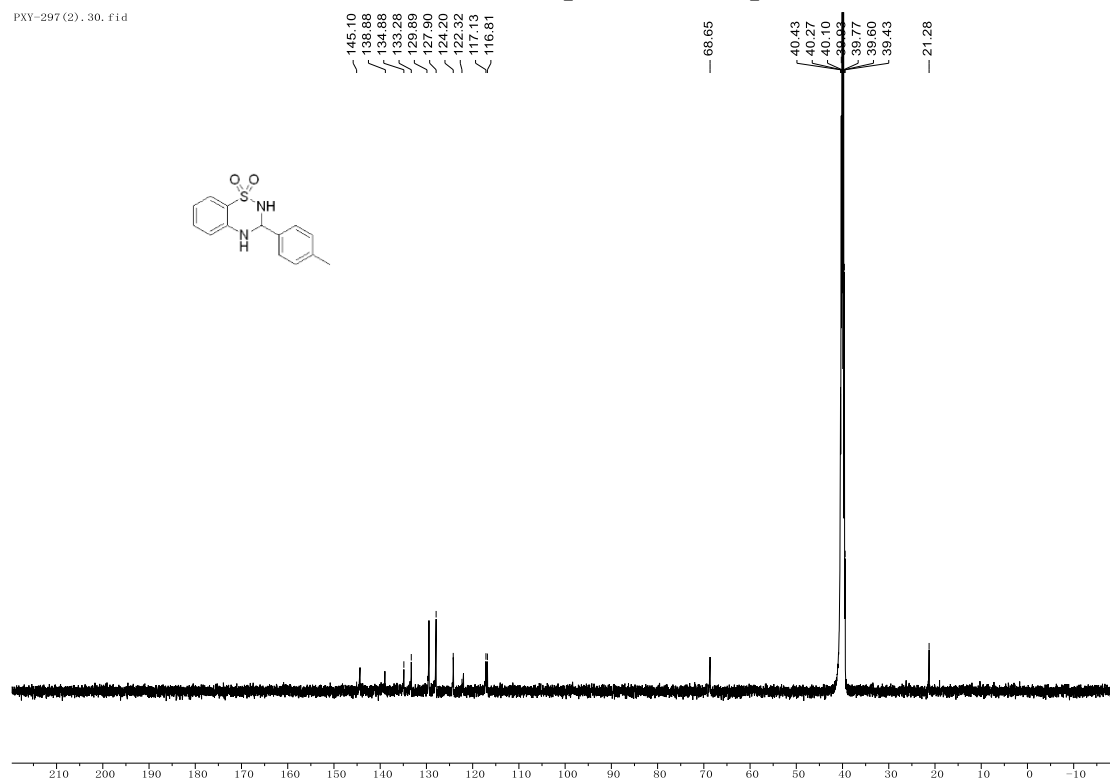

### <sup>1</sup>H NMR (DMSO-*d*<sub>6</sub>) spectra of compound 31

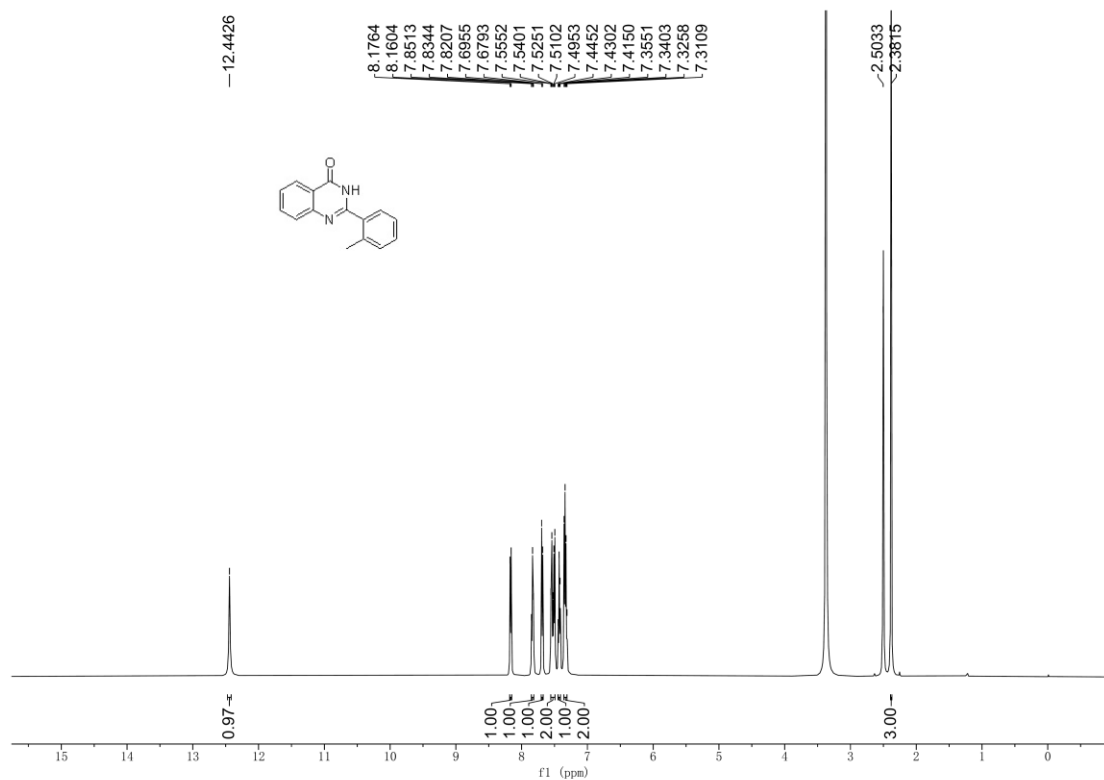

### <sup>13</sup>C NMR (DMSO-*d*<sub>6</sub>) spectra of compound 31

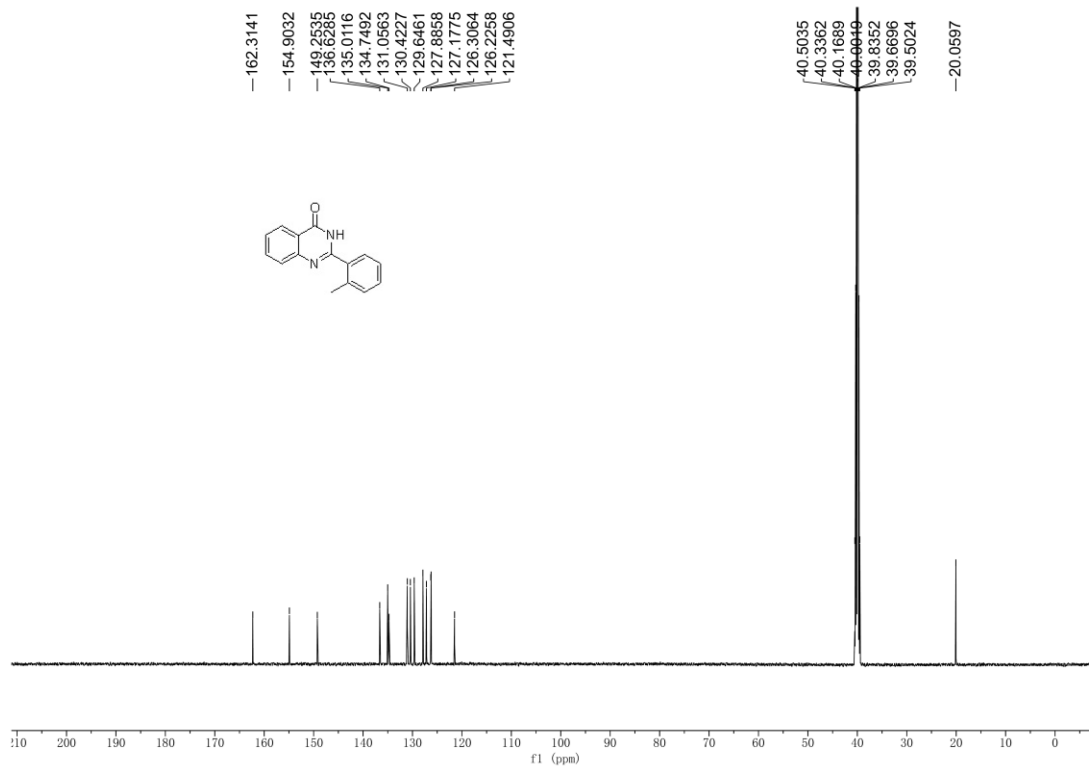

### <sup>1</sup>H NMR (DMSO-*d*<sub>6</sub>) spectra of compound 3m

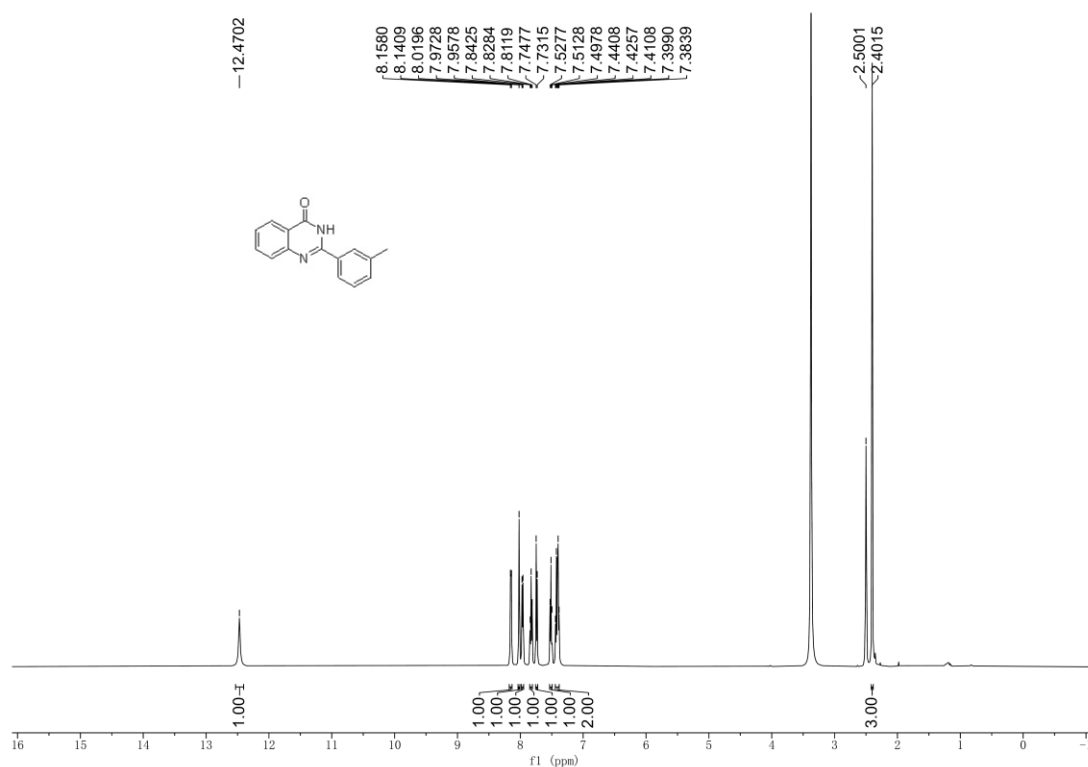

### <sup>13</sup>C NMR (DMSO-*d*<sub>6</sub>) spectra of compound 3m

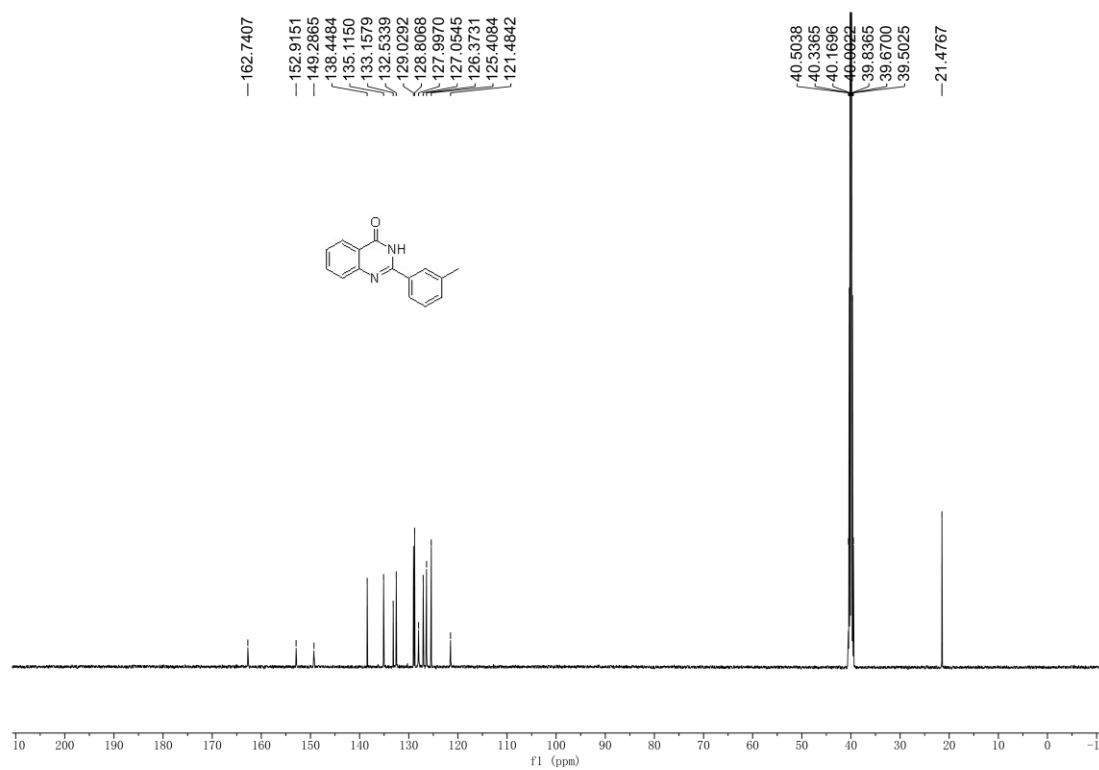



### <sup>1</sup>H NMR (DMSO-*d*<sub>6</sub>) spectra of compound 3n

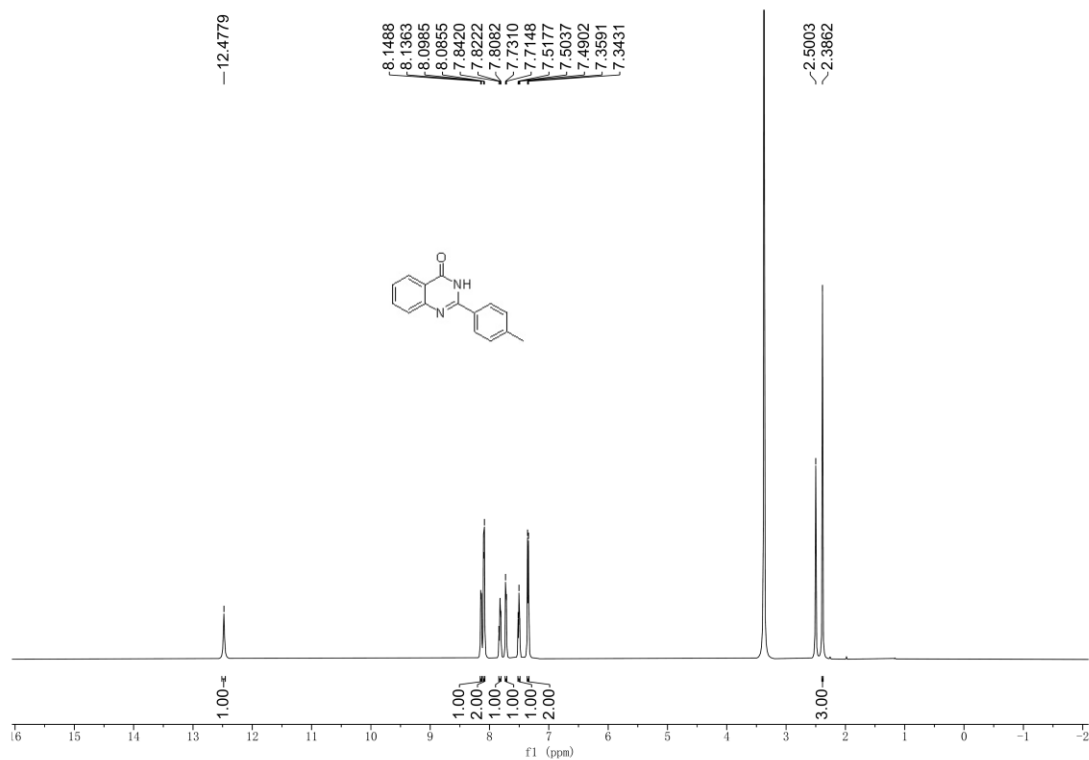

### <sup>13</sup>C NMR (DMSO-*d*<sub>6</sub>) spectra of compound 3n

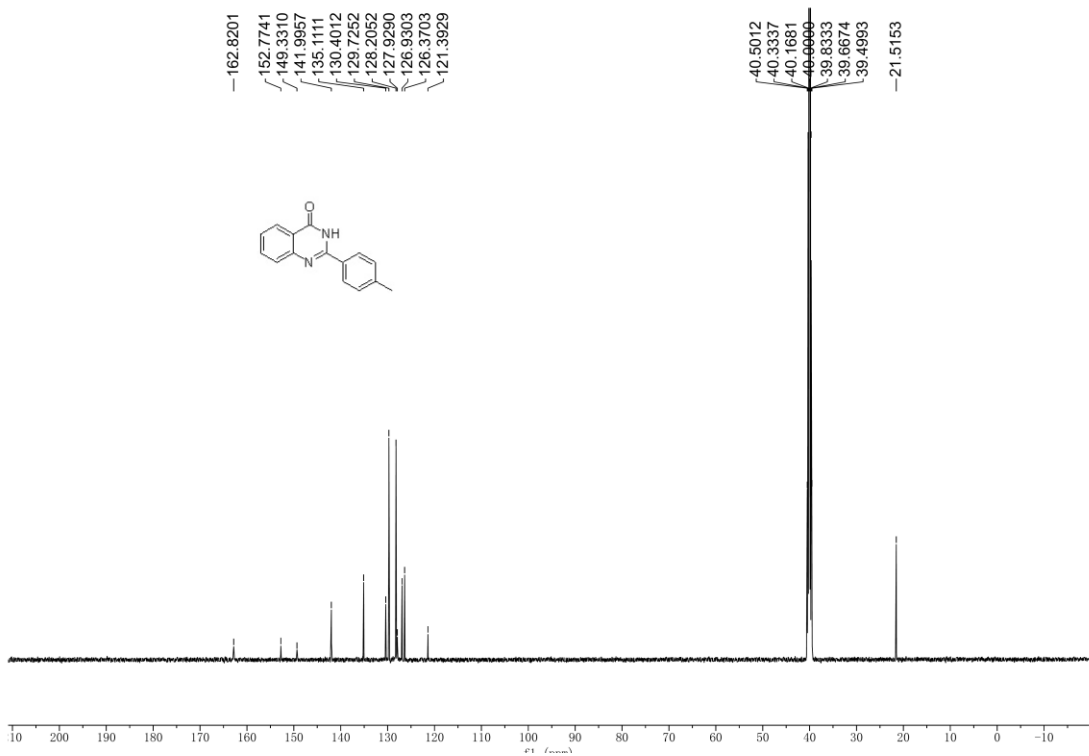

### <sup>1</sup>H NMR (DMSO-*d*<sub>6</sub>) spectra of compound 3o

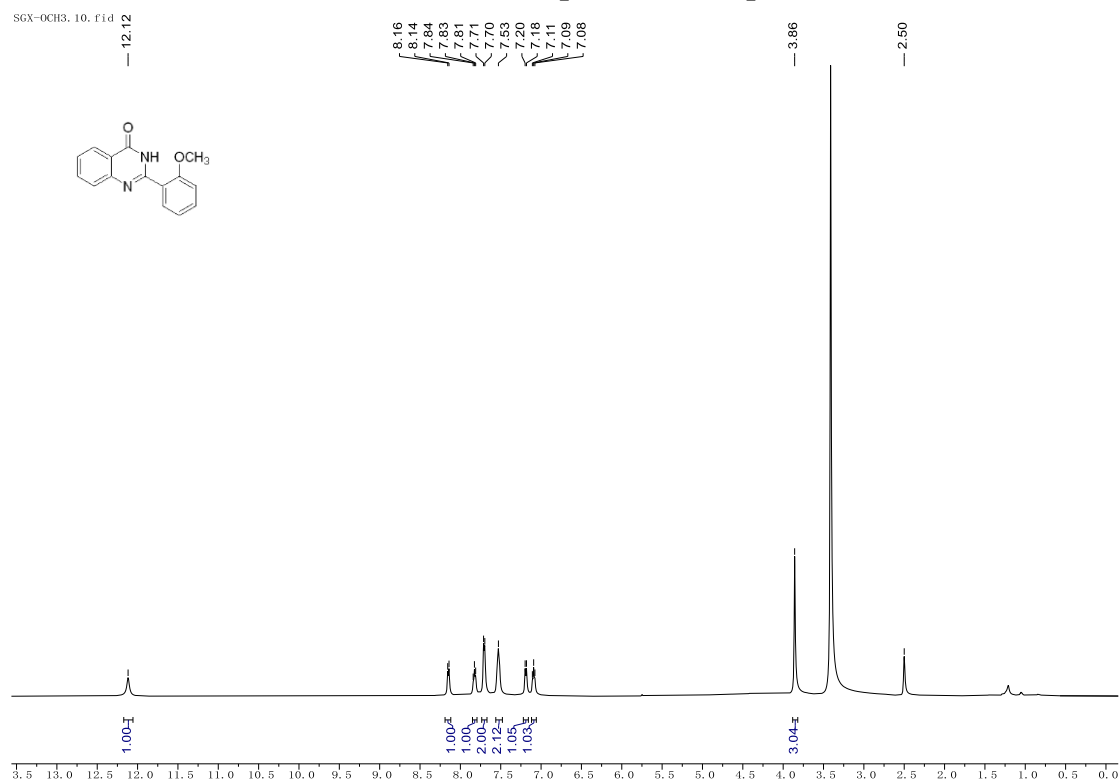

### <sup>13</sup>C NMR (DMSO-*d*<sub>6</sub>) spectra of compound 3o

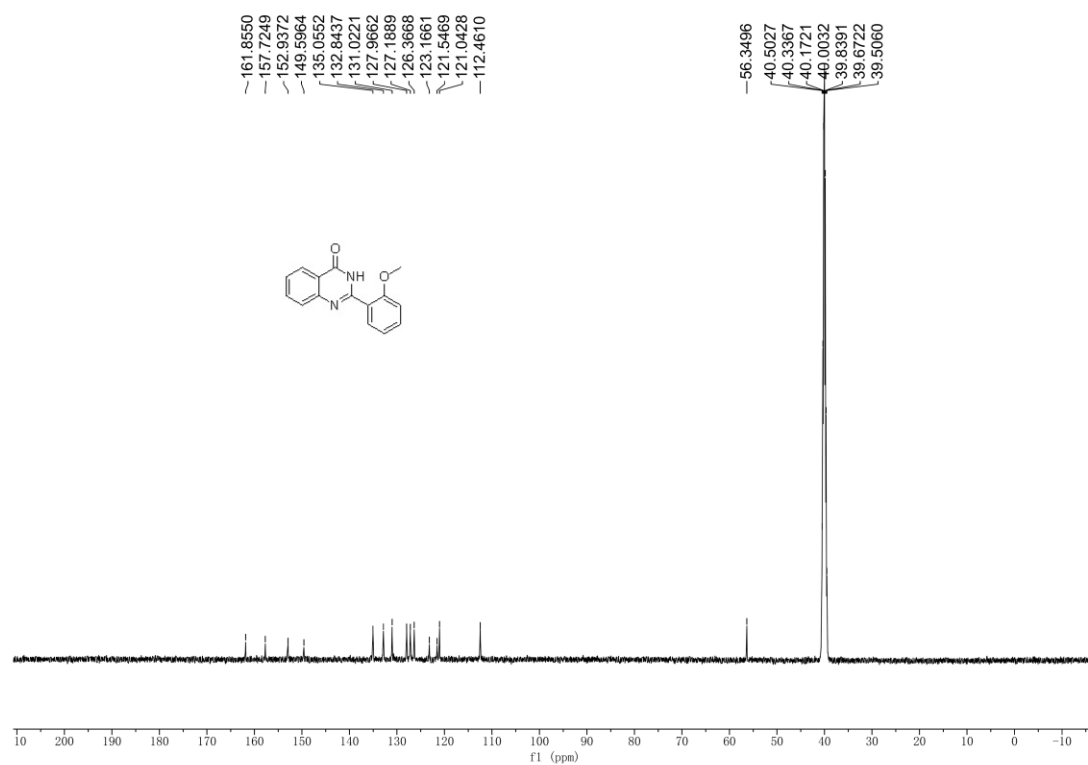

### <sup>1</sup>H NMR (DMSO-*d*<sub>6</sub>) spectra of compound 3p

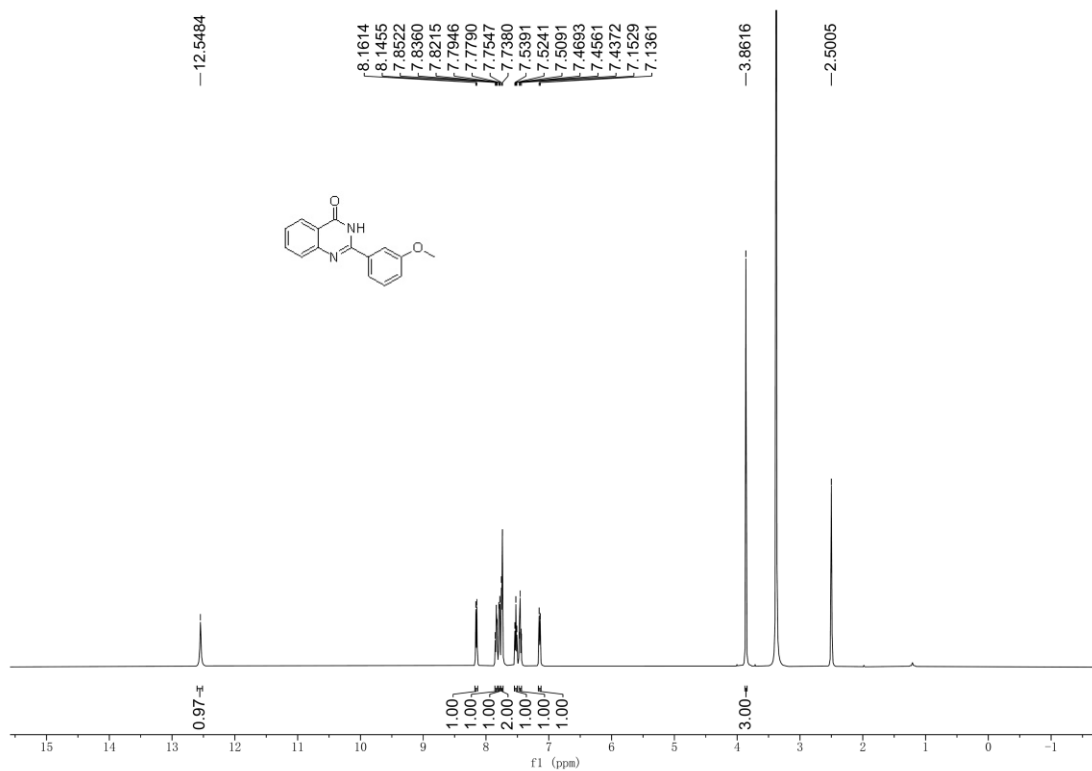

### <sup>13</sup>C NMR (DMSO-*d*<sub>6</sub>) spectra of compound 3p

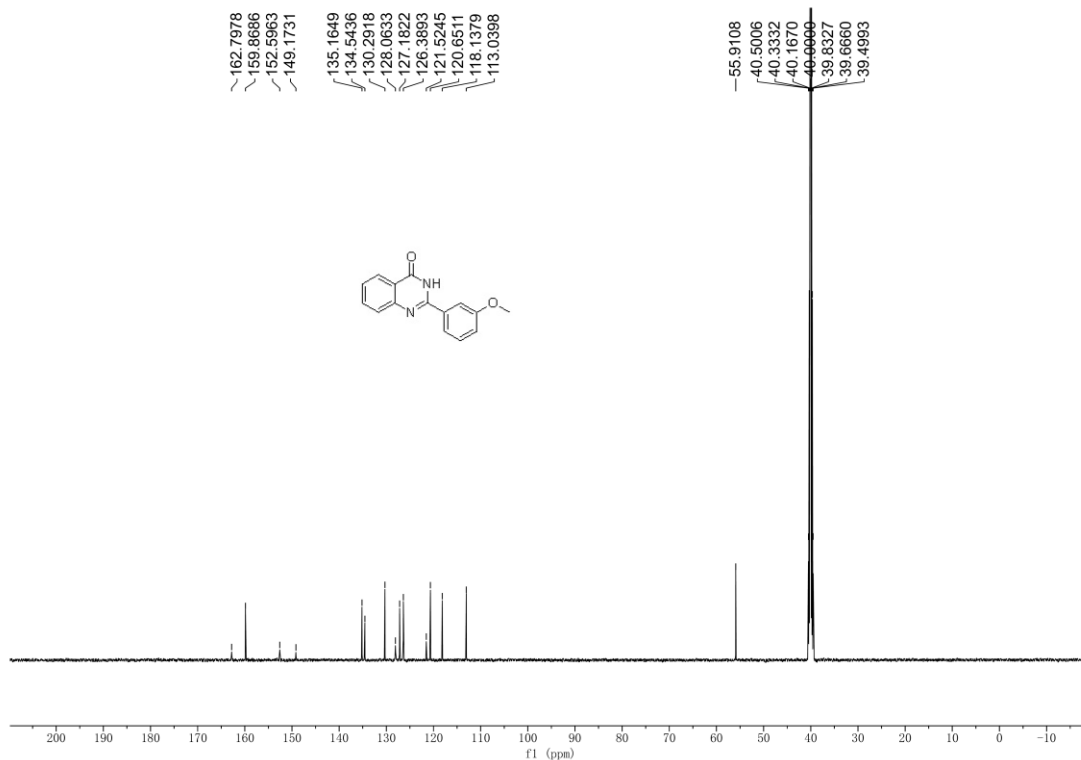

### <sup>1</sup>H NMR (DMSO-*d*<sub>6</sub>) spectra of compound 3q

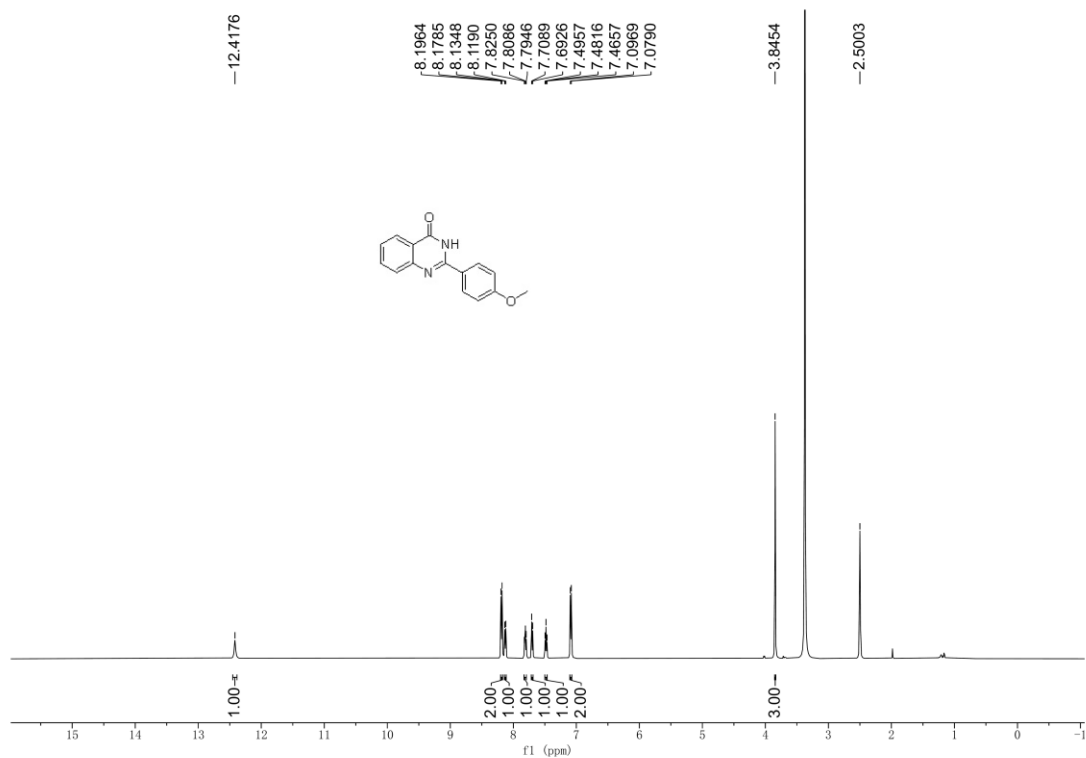

### <sup>13</sup>C NMR (DMSO-*d*<sub>6</sub>) spectra of compound 3q

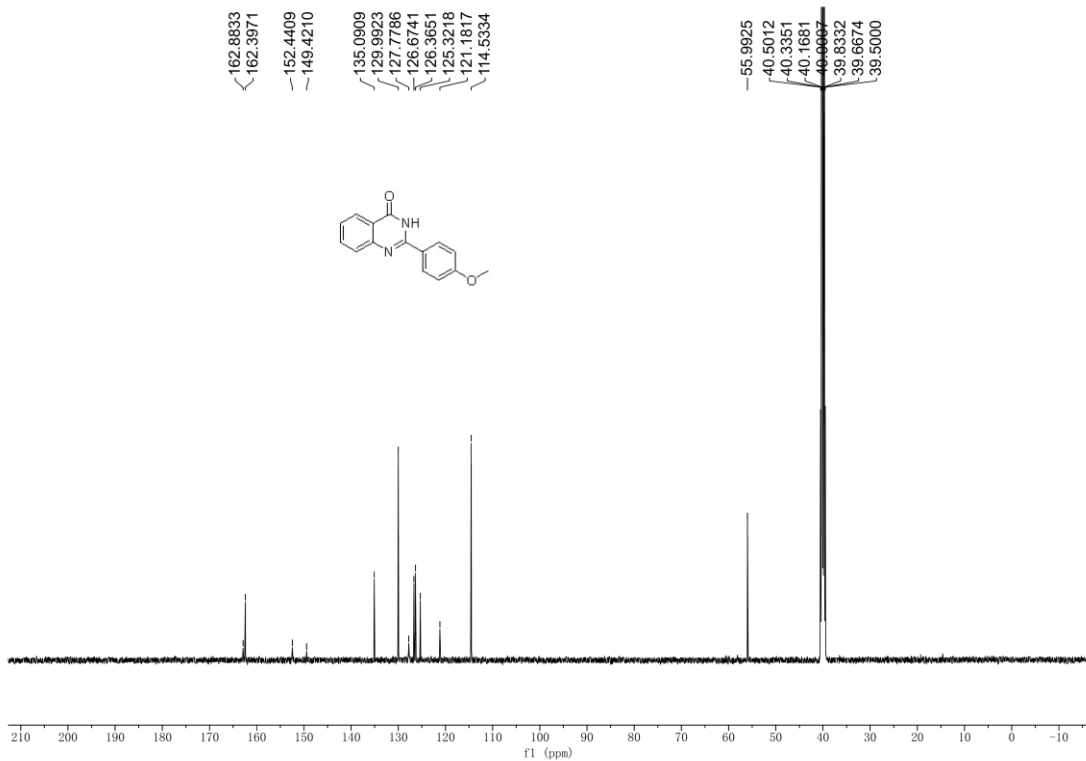

### <sup>1</sup>H NMR (DMSO-*d*<sub>6</sub>) spectra of compound 3r

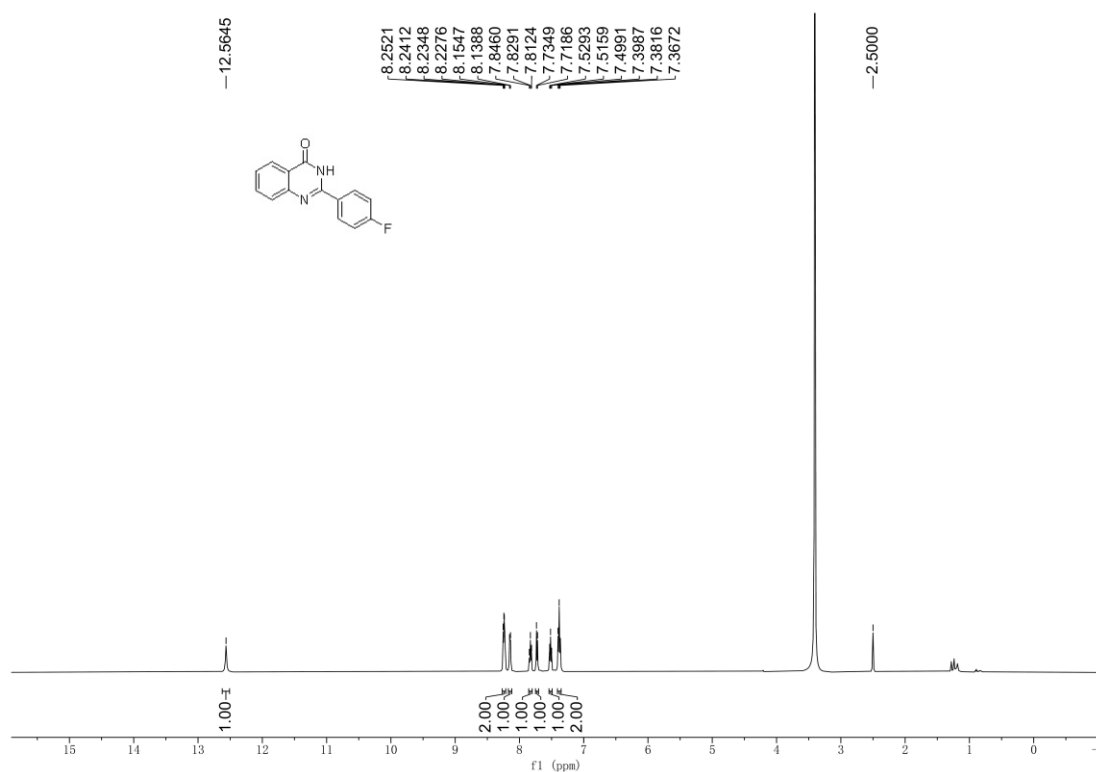

### <sup>13</sup>C NMR (DMSO-*d*<sub>6</sub>) spectra of compound 3r

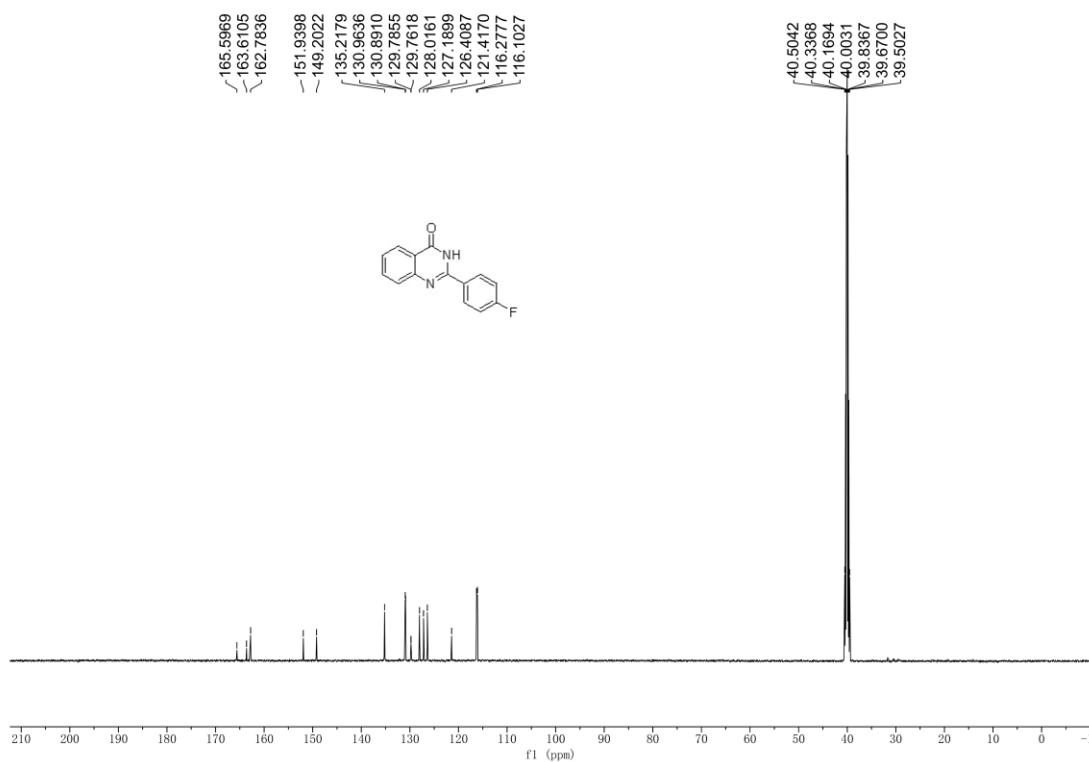

### <sup>1</sup>H NMR (DMSO-*d*<sub>6</sub>) spectra of compound 3s

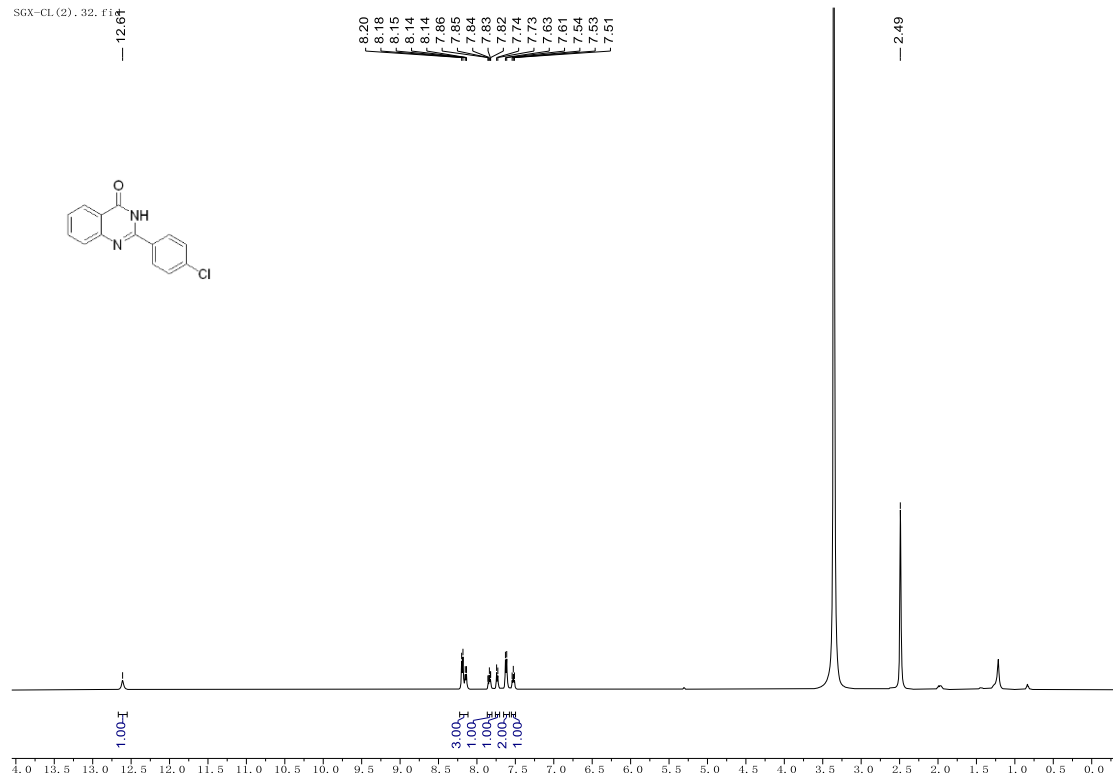

### <sup>13</sup>C NMR (DMSO-*d*<sub>6</sub>) spectra of compound 3s

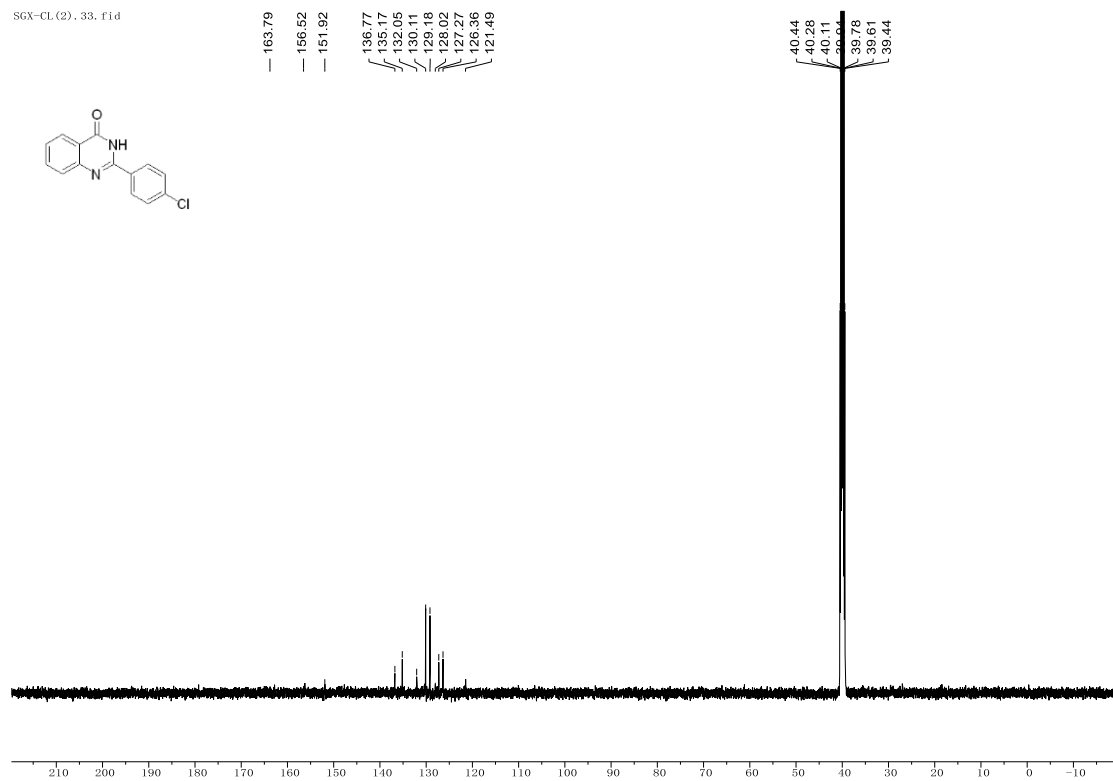

### $^1\text{H}$ NMR (DMSO- $d_6$ ) spectra of compound 3t

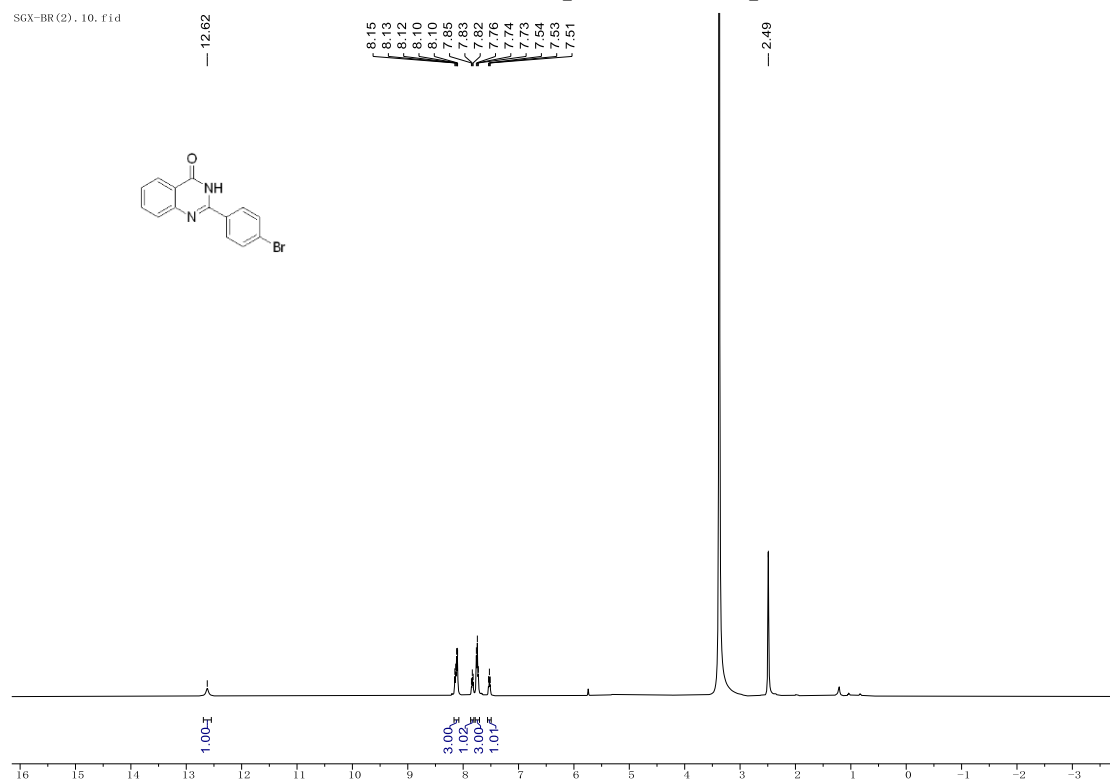

### $^{13}\text{C}$ NMR (DMSO- $d_6$ ) spectra of compound 3t

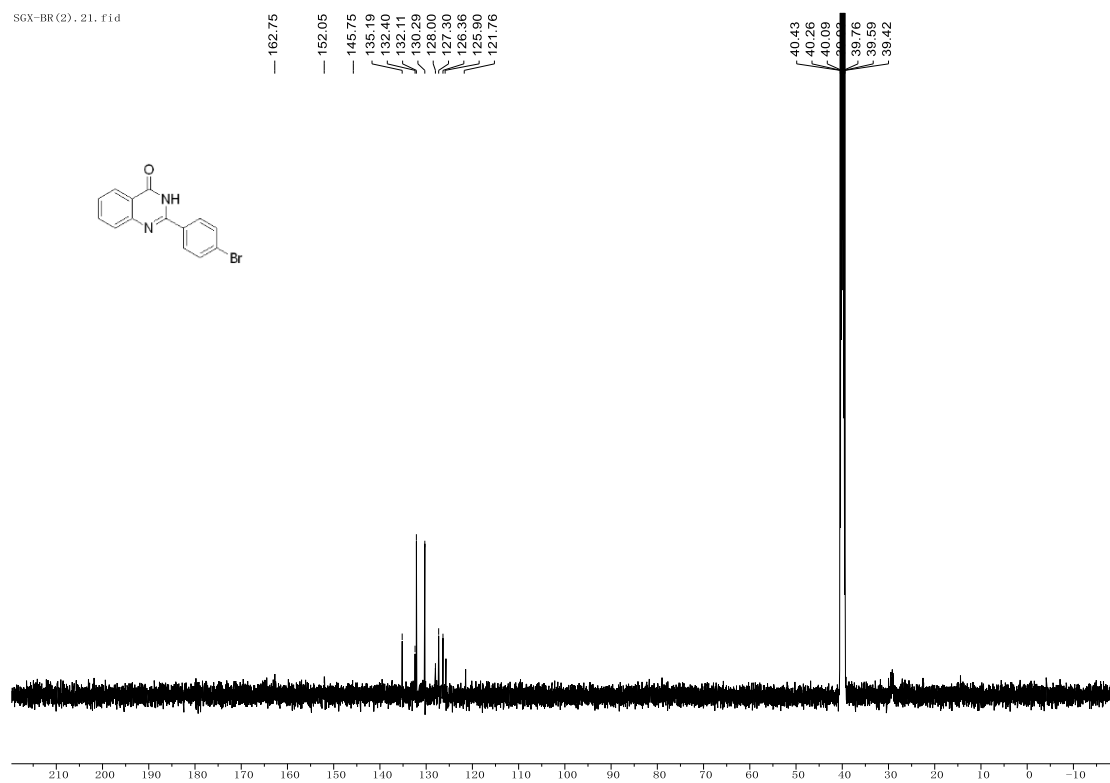

### <sup>1</sup>H NMR (DMSO-*d*<sub>6</sub>) spectra of compound 3u

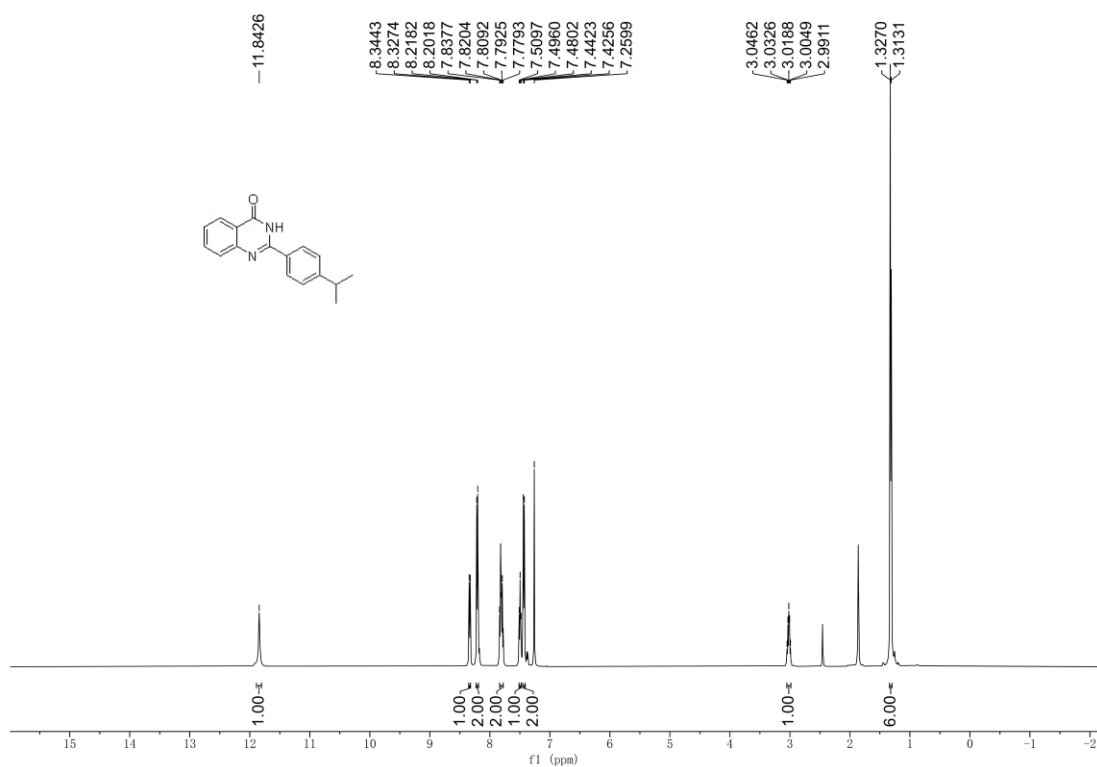

### <sup>13</sup>C NMR (DMSO-*d*<sub>6</sub>) spectra of compound 3u

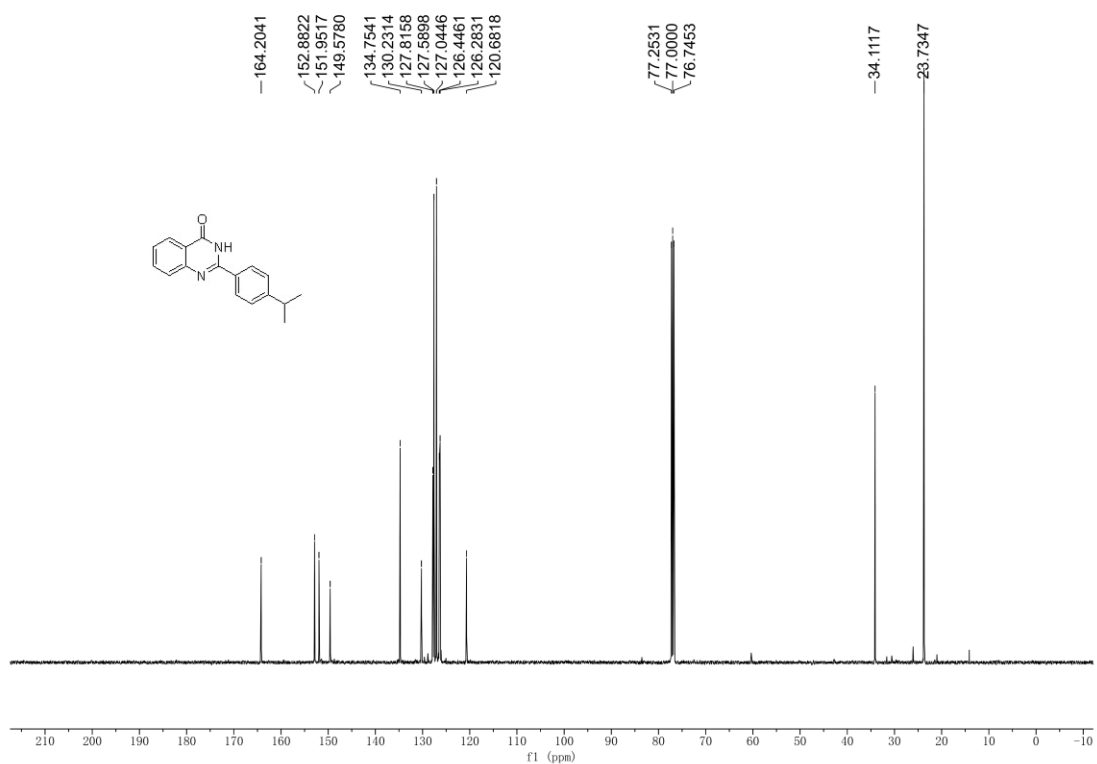



### <sup>1</sup>H NMR (DMSO-*d*<sub>6</sub>) spectra of compound 3v

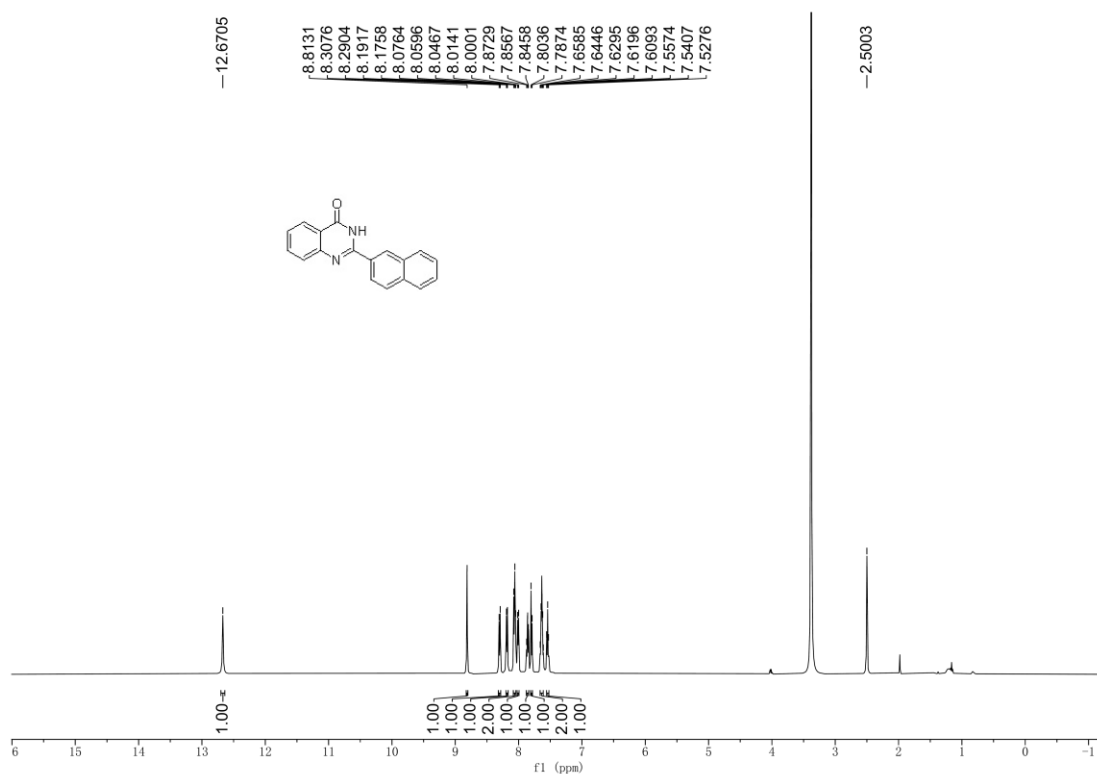

### <sup>13</sup>C NMR (DMSO-*d*<sub>6</sub>) spectra of compound 3v

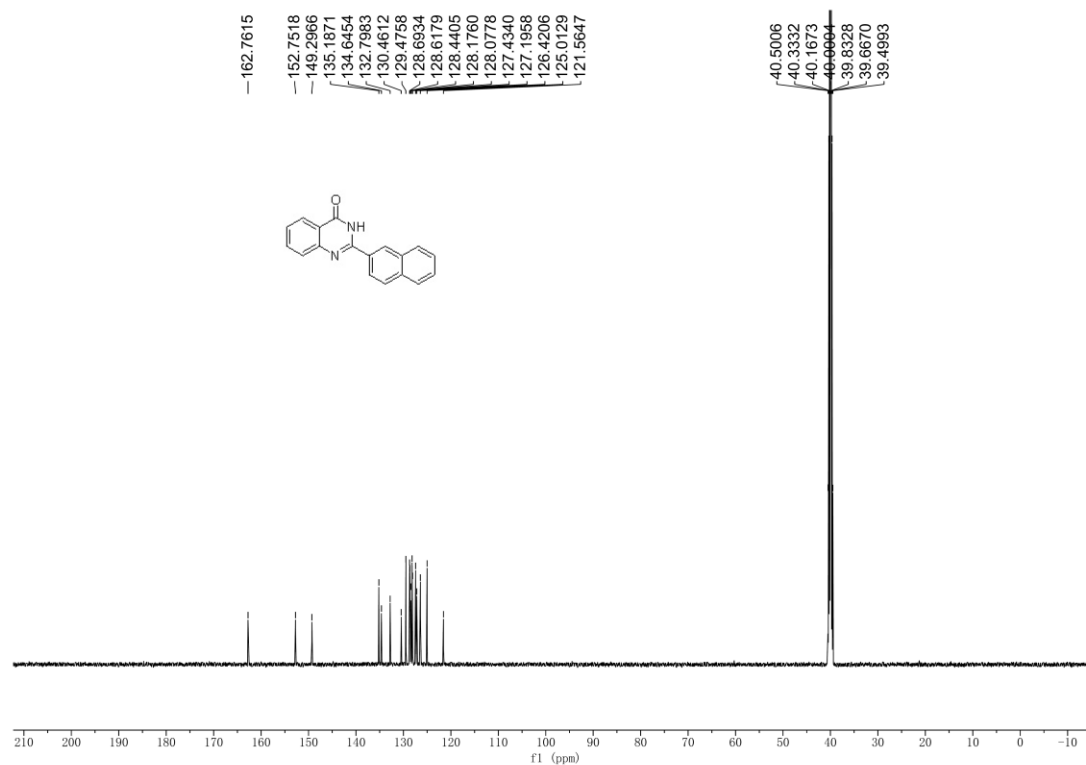

### <sup>1</sup>H NMR (DMSO-*d*<sub>6</sub>) spectra of compound 3w

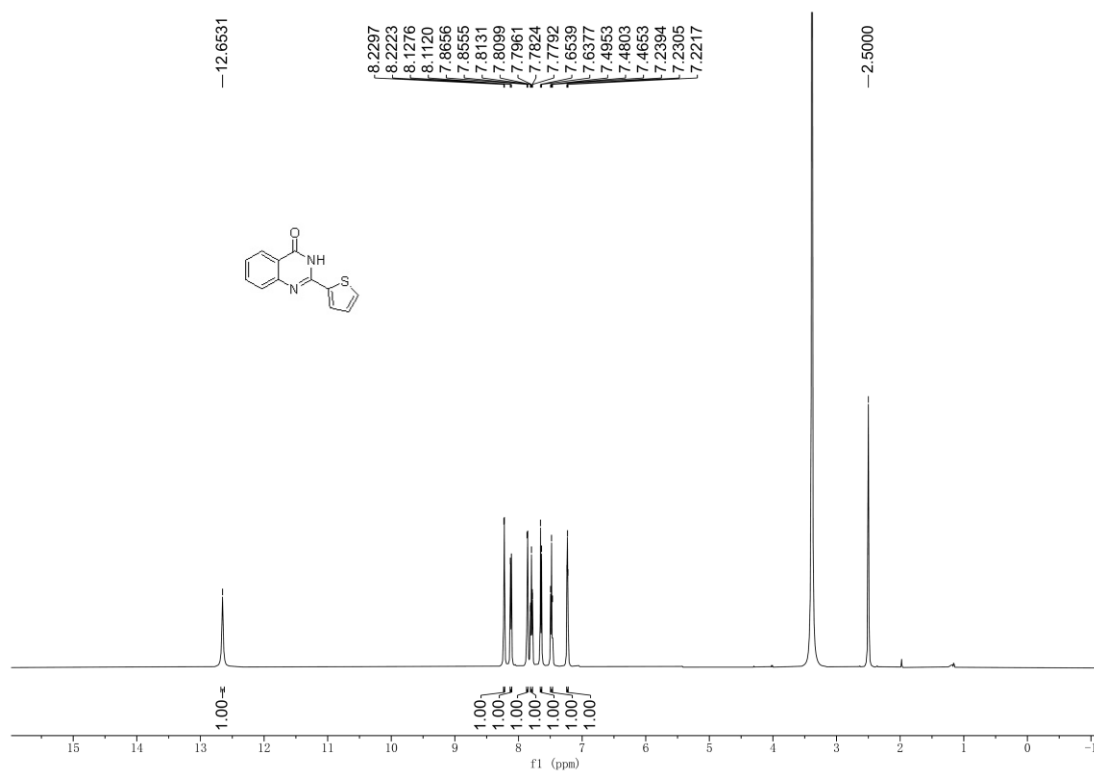

### <sup>13</sup>C NMR (DMSO-*d*<sub>6</sub>) spectra of compound 3w

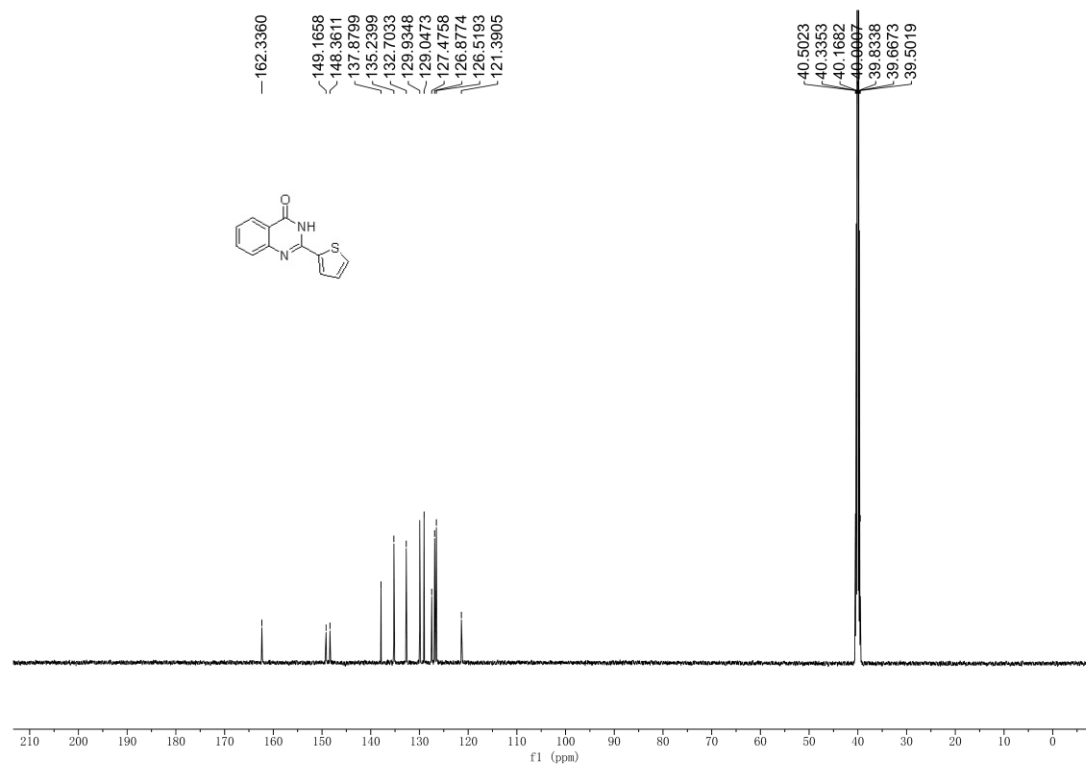

### <sup>1</sup>H NMR (DMSO-*d*<sub>6</sub>) spectra of compound 3aa

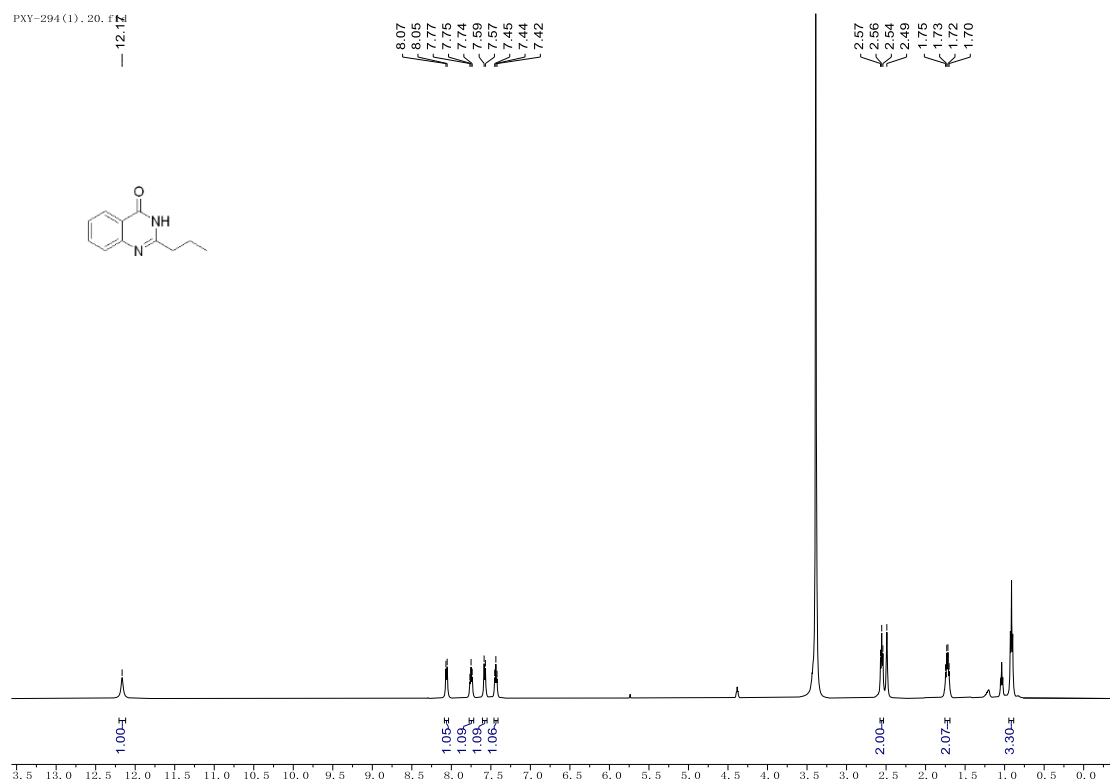

### <sup>13</sup>C NMR (DMSO-*d*<sub>6</sub>) spectra of compound 3aa

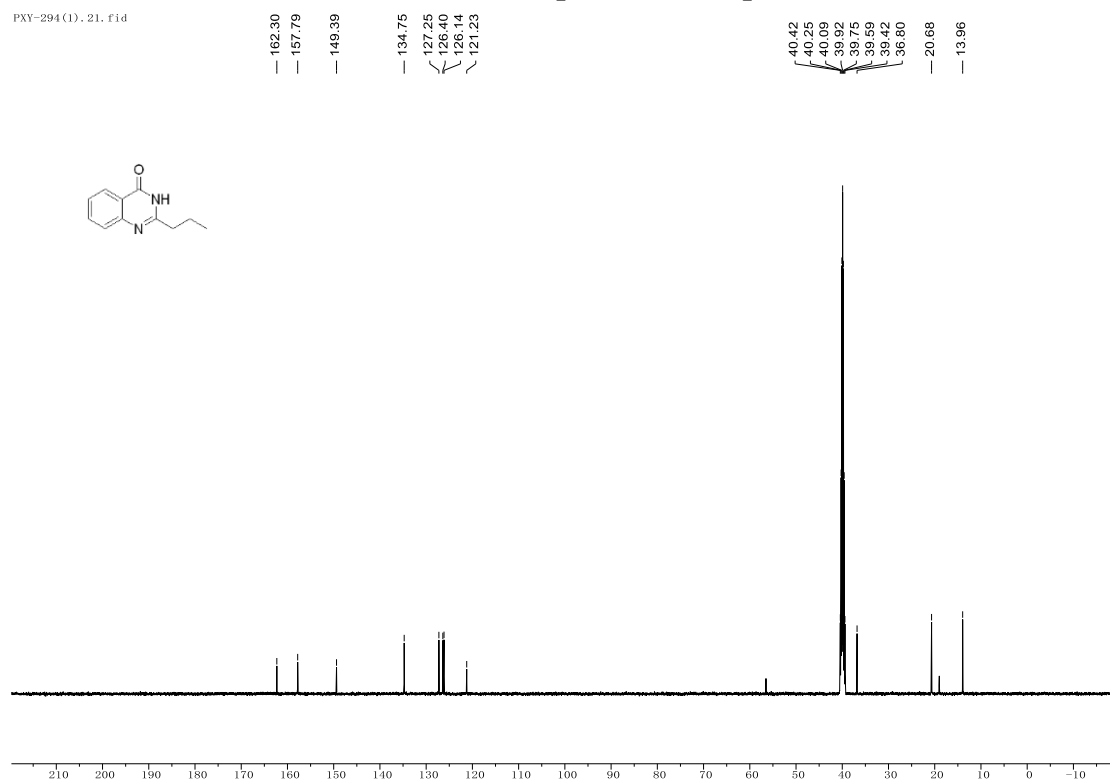

### <sup>1</sup>H NMR (CDCl<sub>3</sub>) spectra of compound 6b

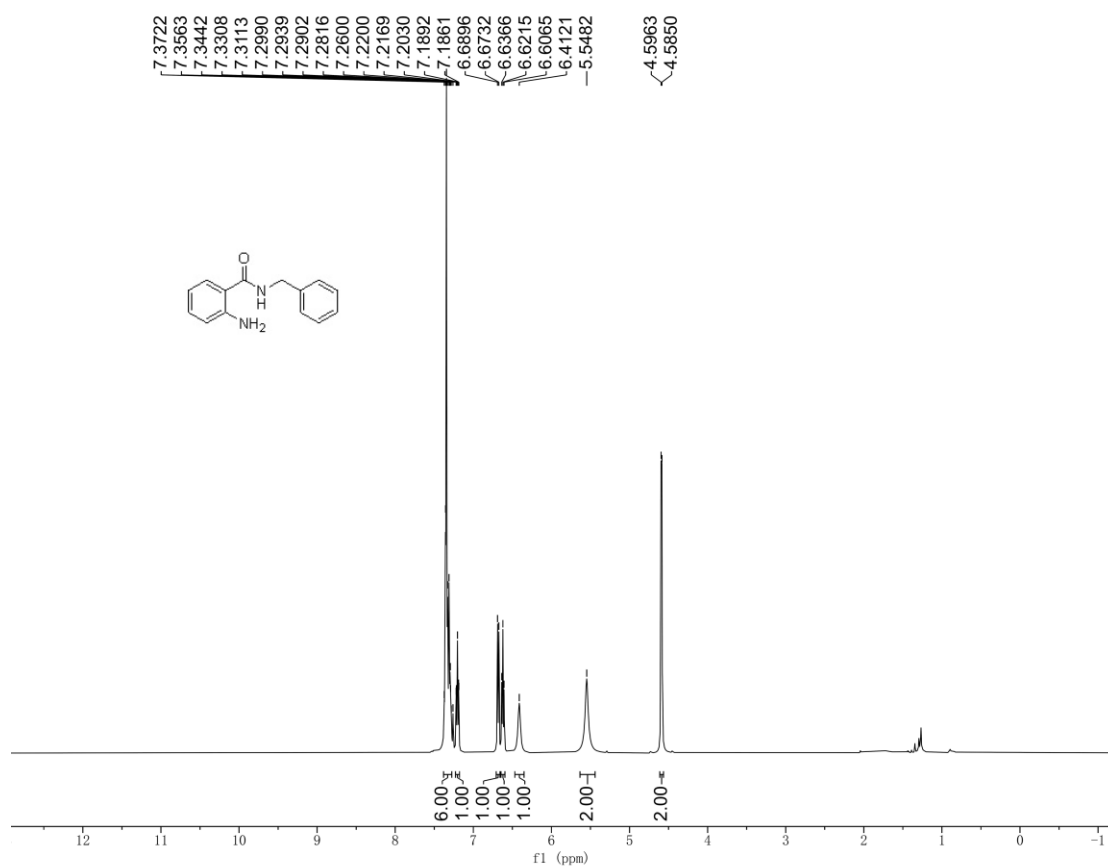

### <sup>13</sup>C NMR (CDCl<sub>3</sub>) spectra of compound 6b

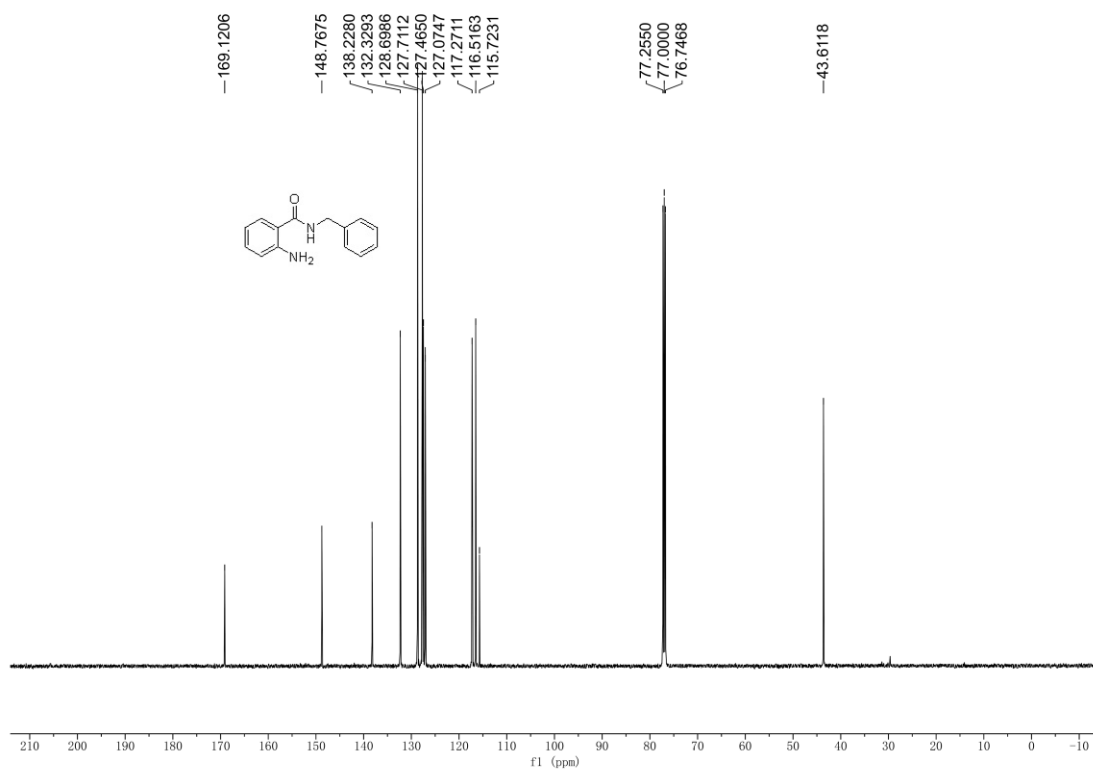

Supplement: d4ob00129j1.pdf [file d4ob00129j1.pdf]
